# Supplementary material for: Meal timing of dietary total antioxidant capacity and its association with all-cause, CVD and cancer mortality: the US national health and nutrition examination survey, 1999–2018
Source: PubMed Central journal article supplement (PMC10329360; doi:10.1186/s12966-023-01487-1), 2023-07-07
Supplement: 12966_2023_1487_MOESM2_ESM.pdf [file 12966_2023_1487_MOESM2_ESM.pdf]

## **Additional file 2. Supplementary material and tables**

### **Adjusted covariates selection.**

Covariates were selected mainly based on the traditional risk factors and the differential variables from baseline characteristics. We listed the associations of characteristic variables with all-cause of mortality (**Details were shown as follows**). Except for race/ethnicity, physical activity and lunch DAC intake, all other variables were significantly associated with all-cause of mortality. These significant variables were first selected for confounding factors. However, race/ethnicity and physical activity have been widely adjusted for in studies of diet and disease [1,2]. For lunch DAC intake, one study reported that lunch foods intake is related to total daily food intake [3], which indicated the lunch DAC intake may affect breakfast and dinner DAC intake. Therefore, we also adjusted for race/ethnicity, physical activity, and the DAC at lunch. See details as follows:

| <b>Characteristic variables</b>      | <b>HR (95% CI)</b> | <b>P value</b> |
|--------------------------------------|--------------------|----------------|
| Age (years)                          | 1.09 (1.09, 1.10)  | <0.0001        |
| Sex                                  | 0.88 (0.83, 0.94)  | <0.0001        |
| Race/ethnicity                       | 1.00 (0.96, 1.04)  | 0.963          |
| Education                            | 0.83 (0.79, 0.86)  | <0.0001        |
| Income                               | 0.65 (0.62, 0.67)  | <0.0001        |
| Body mass index (kg/m <sup>2</sup> ) | 1.02 (1.01, 1.03)  | <0.0001        |
| Alcohol intake (g/day)               | 1.00 (1.00, 1.01)  | 0.001          |
| Smoking status                       | 1.27 (1.21, 1.33)  | <0.0001        |
| Physical activity (METs-h/week)      | 1.00 (0.99, 1.01)  | 0.551          |
| Dietary energy intake (kcal)         | 1.00 (1.00, 1.00)  | <0.0001        |
| Adherence to HEI-2015 score          | 0.99 (0.99, 1.00)  | <0.0001        |
| Breakfast DAC intake (mmol)          | 1.06 (1.04, 1.08)  | <0.0001        |
| Lunch DAC intake (mmol)              | 1.00 (0.98, 1.02)  | 0.915          |
| Dinner DAC intake (mmol)             | 0.92 (0.89, 0.95)  | <0.0001        |
| Dietary supplement use (%)           | 1.19 (1.11, 1.28)  | <0.0001        |
| Hypertension                         | 3.66 (3.38, 3.96)  | <0.0001        |
| CVD                                  | 4.80 (4.34, 5.30)  | <0.0001        |
| Hyperlipidemia                       | 3.39 (3.11, 3.69)  | <0.0001        |
| Diabetes                             | 3.77 (3.48, 4.07)  | <0.0001        |
| Cancer                               | 3.66 (3.33, 4.03)  | <0.0001        |

Abbreviations: HRs, hazard ratio; CIs, confidence intervals; HEI-2015, Healthy Eating Index 2015; BMI, body mass index; CVD, cardiovascular disease.

## Reference

1. Wang P, Song M, Eliassen AH, Wang M, Fung TT, Clinton SK, Rimm EB, Hu FB, Willett WC, Tabung FK et al: Optimal dietary patterns for prevention of chronic disease. *Nat Med* 2023, 29(3):719-728.
2. Ma L, Hu Y, Alperet DJ, Liu G, Malik V, Manson JE, Rimm EB, Hu FB, Sun Q: Beverage consumption and mortality among adults with type 2 diabetes: prospective cohort study. *BMJ* 2023, 381:e073406.
3. de Castro JM: When, how much and what foods are eaten are related to total daily food intake. *Br J Nutr* 2009, 102(8):1228-1237.



**Supplementary Fig. 1 Associations of serum CRP with quintiles of total, breakfast, lunch, dinner, and  $\Delta$  DAC**

Abbreviations: CIs, confidence intervals; CRP, C-reactive protein; DAC, dietary total antioxidant capacity; HEI-2015, Healthy Eating Index 2015; BMI, body mass index; CVD, cardiovascular disease.

Model was adjusted for, age, sex, race, education, family income, dietary energy intake, alcohol consumption per day, smoking status, physical activity, BMI, diabetes, hypertension, CVD, cancer, hyperlipidaemia, adherence to HEI-2015 score, and dietary supplement use. Models for breakfast DAC, lunch DAC, and dinner DAC were further adjusted except for the one that defined the group.

**Supplementary Table 1 Detailed substitution information of DAC calculation**

| <b>Food Description</b>            | <b>Substitute Information</b>                                                             |
|------------------------------------|-------------------------------------------------------------------------------------------|
| <b>Fruits</b>                      |                                                                                           |
| <b>Citrus, melons, and berries</b> |                                                                                           |
| Boysenberries, frozen              | Use strawberries instead                                                                  |
| Boysenberries, raw                 | Use strawberries instead                                                                  |
| Calamondin, raw                    | Use orange instead                                                                        |
| Cassaba melon, raw                 | Use honeydew melon instead                                                                |
| Dewberries, raw                    | Use blackberries instead                                                                  |
| Huckleberries, raw                 | Use the mean value of "Red whortleberries, frozen" and "Red whortleberries, wild" instead |
| Kumquats, raw                      | Use orange instead                                                                        |
| Loganberries, frozen               | Use Raspberries instead                                                                   |
| Mulberries, raw                    | Use Dewberries instead                                                                    |
| Tangelos, raw                      | Use orange instead                                                                        |
| Youngberries, raw                  | Use Dewberries instead                                                                    |
| Juneberries, raw                   | Use the mean value of berries                                                             |
| Loganberries, raw                  | Use Dewberries instead                                                                    |
| <b>Other fruits</b>                |                                                                                           |
| Banana flakes, dehydrated          | Use "Apples, dried" instead                                                               |
| Carambolas (starfruit), raw        | Use the mean value of other fruits                                                        |
| Currants, dried                    | Use "Figs, dried" instead                                                                 |
| Fruit nectar                       | Use the mean value of less than 100% fruit juice                                          |
| Fruit, all types, dried, cooked    | Use the mean value of all fruit dried                                                     |
| Litchis, dried                     | Use the mean value of other fruit dried                                                   |
| Litchis, raw                       | Use the mean value of other fruits                                                        |

| <b>Food Description</b>      | <b>Substitute Information</b>               |
|------------------------------|---------------------------------------------|
| <b>(continued)</b>           |                                             |
| Passion fruit, raw           | Use "Guava, raw" instead                    |
| Peaches, dried               | Use the mean value of other fruit dried     |
| Pears, dried                 | Use the mean value of other fruit dried     |
| Persimmon, raw               | Use the mean value of other fruits          |
| Rhubarb, raw                 | Use the mean value of other fruits          |
| <b>Grains</b>                |                                             |
| <b>Whole grains</b>          |                                             |
| Amaranth                     | Use the mean value of whole grain           |
| Millett                      | Use the mean value of whole grain           |
| Quinoa                       | Use the mean value of whole grain           |
| Triticale                    | Use "Wheat" instead                         |
| Wild rice                    | Use "Rice, whole grain" instead             |
| <b>Refined grains</b>        |                                             |
| Farina                       | Use the mean value of refined grain         |
| Masa                         | Use the mean value of refined grain         |
| Semolina                     | Use the mean value of refined grain         |
| <b>Vegetables</b>            |                                             |
| <b>Dark Green Vegetables</b> |                                             |
| Arugula, raw                 | Use the mean value of dark green vegetables |
| Beet greens, cooked          | Use the mean value of dark green vegetables |
| Beet greens, raw             | Use the mean value of dark green vegetables |
| Bitter melon leaves, cooked  | Use the mean value of dark green vegetables |

| <b>Food Description</b>                                | <b>Substitute Information</b>                     |
|--------------------------------------------------------|---------------------------------------------------|
| <b>(continued)</b>                                     |                                                   |
| Cabbage, mustard, cooked                               | Use "Cabbage, Chinese, cooked" instead            |
| Cabbage, mustard, raw                                  | Use "Cabbage" instead                             |
| Chard, cooked                                          | Use the mean value of dark green vegetables       |
| Chicory greens, raw                                    | Use the mean value of dark green vegetables       |
| Chrysanthemum garland, cooked                          | Use the mean value of dark green vegetables       |
| Cress, cooked, from raw or canned (drained)            | Use the mean value of dark green vegetables       |
| Cress, raw                                             | Use "Parsley" instead                             |
| Endive, raw                                            | Use the mean value of dark green vegetables       |
| Escarole, cooked                                       | Use the mean value of dark green vegetables       |
| Grape leaves, raw                                      | Use the mean value of dark green vegetables       |
| Lettuce, cooked                                        | Use "Cabbage, Chinese, cooked" instead            |
| Taro leaves, cooked                                    | Use the mean value of dark green vegetables       |
| Turnip greens, cooked, from frozen or canned (drained) | Use the mean value of dark green vegetables       |
| Turnip greens, cooked, from raw                        | Use the mean value of dark green vegetables       |
| Turnips, cooked, from raw, frozen, or canned (drained) | Use the mean value of dark green vegetables       |
| Watercress, cooked,                                    | Use the mean value of dark green vegetables       |
| Watercress, raw                                        | Use the mean value of dark green vegetables       |
| <b>Starchy Vegetables</b>                              |                                                   |
| Dasheen, cooked                                        | Use the mean value of starchy vegetables          |
| Salsify, cooked                                        | Use the mean value of uncooked starchy vegetables |
| Tannier, cooked                                        | Use the mean value of uncooked starchy vegetables |
| Tapioca, pearl, dry                                    | Use the mean value of uncooked starchy vegetables |
| Taro, cooked                                           | Use the mean value of cooked starchy vegetables   |
| Taro, raw                                              | Use the mean value of uncooked starchy vegetables |

| Food Description                           | Substitute Information                            |
|--------------------------------------------|---------------------------------------------------|
| <b>(continued)</b>                         |                                                   |
| Water chestnuts, cooked                    | Use the mean value of cooked starchy vegetables   |
| Water chestnuts, raw                       | Use the mean value of uncooked starchy vegetables |
| <b>Other Red and Orange Vegetables</b>     |                                                   |
| Carrots, dried                             | Use "carrot,row" instead                          |
| Pimiento                                   | Use "Pepper, bell , red" instead                  |
| <b>Other Vegetable</b>                     |                                                   |
| Bamboo shoots, cooked                      | Use the "asparagus, cooked" instead               |
| Bamboo shoots, raw                         | Use the "asparagus" instead                       |
| Bitter melon, cooked                       | Use the mean value of other vegetables            |
| Breadfruit, raw                            | Use the mean value of other vegetables            |
| Cactus (Nopales), cooked                   | Use the mean value of other vegetables            |
| Cactus (Nopales), raw                      | Use the mean value of other vegetables            |
| Cauliflower, cooked, from canned (drained) | Use the mean value of other vegetables            |
| Celery juice                               | Use "celery" instead                              |
| Chayote (Christophine), cooked             | Use the mean value of other vegetables            |
| Chayote (Christophine), raw                | Use the mean value of other vegetables            |
| Eggplant, cooked                           | Use the mean value of other vegetables            |
| Eggplant, pickled                          | Use the mean value of other vegetables            |
| Escarole, raw                              | Use the mean value of other vegetables            |
| Fennel bulb, cooked                        | Use the mean value of other vegetables            |
| Garlic, cooked                             | Use the "Ginger root, raw" instead                |
| Horseradish tree, leafy tips, cooked       | Use the mean value of other vegetables            |
| Jute, potherb, cooked                      | Use the mean value of other vegetables            |
| Kohlrabi, cooked                           | Use "Kale, cooked, from raw " instead             |

| <b>Food Description</b>                                       | <b>Substitute Information</b>                 |
|---------------------------------------------------------------|-----------------------------------------------|
| <b>(continued)</b>                                            |                                               |
| Kohlrabi, raw                                                 | Use "Kale, cooked, from raw " instead         |
| Leeks, cooked                                                 | Use the mean value of other vegetables        |
| Mushrooms, dehydrated                                         | NA                                            |
| Mustard greens, cooked, from frozen or canned (drained)       | Use the mean value of other vegetables        |
| Mustard greens, cooked, from raw                              | Use the mean value of other vegetables        |
| Okra, cooked, from frozen or canned (drained)                 | Use the mean value of other vegetables        |
| Onions, young green (spring or scallion), raw                 | Use "Onions" instead                          |
| Palm hearts, cooked                                           | Use "Saw Palmetto" instead                    |
| Palm hearts, raw                                              | Use "Saw Palmetto" instead                    |
| Plantain or green bananas, cooked                             | Used "banana" instead                         |
| Pokeberry shoots, cooked                                      | Use the mean value of other vegetables        |
| Radicchio, raw                                                | Use the mean value of other vegetables        |
| Radish, cooked                                                | Use the mean value of cooked other vegetables |
| Rutabaga, cooked                                              | Use the mean value of cooked other vegetables |
| Sauerkraut                                                    | Use the mean value of other vegetables        |
| Seaweed, raw                                                  | Use the mean value of other vegetables        |
| Snow peas, cooked, from raw or frozen                         | Use the mean value of cooked other vegetables |
| Snow peas, raw                                                | Use the mean value of cooked other vegetables |
| Spinach, cooked, from frozen or canned (drained)              | Use the mean value of cooked other vegetables |
| Squash, spaghetti, cooked                                     | Use the mean value of other vegetables        |
| Squash, summer, cooked, from raw, frozen, or canned (drained) | Use the mean value of other vegetables        |
| String (snap) beans, cooked, from frozen or canned (drained)  | Use the mean value of other vegetables        |
| String (snap) beans, cooked, from raw                         | Use the mean value of other vegetables        |
| String (snap) beans, raw                                      | Use the mean value of other vegetables        |

| Food Description                                         | Substitute Information                                |
|----------------------------------------------------------|-------------------------------------------------------|
| <b>(continued)</b>                                       |                                                       |
| Taro chips                                               | Use the mean value of uncooked starchy vegetables     |
| Taro leaves, raw                                         | Use the mean value of other vegetables                |
| Winter melon (wax gourd), cooked                         | Use the mean value of cooked other vegetables         |
| <b>Beans and Peas</b>                                    |                                                       |
| Bayo beans, cooked                                       | Use the mean value of cooked beans                    |
| Bayo beans, uncooked                                     | Use the mean value of uncooked beans                  |
| Black beans, cooked                                      | Use "Black eye beans, haricot blanc" instead          |
| Black beans, uncooked                                    | Use the mean value of uncooked beans                  |
| Brown beans, cooked                                      | Use the mean value of cooked beans                    |
| Brown beans, uncooked                                    | Use the mean value of cooked beans                    |
| Calico beans, cooked                                     | Use the mean value of cooked beans                    |
| Calico beans, uncooked                                   | Use the mean value of cooked beans                    |
| Carob flour or powder                                    | Use the mean value of cooked beans                    |
| Chickpeas (garbanzo beans, bengal gram), cooked          | Use the mean value of cooked beans                    |
| Cowpeas, common (blackeyed, crowder, and southern peas), | Use the mean value of cooked beans                    |
| Cowpeas, common (blackeyed, crowder, and southern peas), | Use "Black eye beans, haricot blanc" instead          |
| Fava beans (broad beans), cooked                         | Use "Kidney beans, canned, light red, cooked" instead |
| Kidney beans, cooked                                     | Use "Kidney beans, canned, light red, cooked" instead |
| Lentils, cooked                                          | Use "Flageolet beans, green, canned, boiled" instead  |
| Lima beans (mature), cooked                              | Use the mean value of cooked beans                    |
| Lima beans (mature), uncooked                            | Use the mean value of uncooked beans                  |
| Mung beans, cooked                                       | Use the mean value of cooked beans                    |
| Split peas, cooked                                       | Use the mean value of cooked beans                    |
| White beans, cooked                                      | Use the mean value of cooked beans                    |

| Food Description                          | Substitute Information                                                          |
|-------------------------------------------|---------------------------------------------------------------------------------|
| (continued)                               |                                                                                 |
| <b>Protein Foods</b>                      |                                                                                 |
| <b>Meat (beef, veal, pork, lamb, gam)</b> |                                                                                 |
| Armadillo                                 | Use mean value of meat instead                                                  |
| Bear                                      | Use mean value of meat instead                                                  |
| Beaver                                    | Use mean value of meat instead                                                  |
| Game meat (other)                         | Use mean value of meat instead                                                  |
| Ham (not cured)                           | Use pork instead                                                                |
| Opossum                                   | Use mean value of meat instead                                                  |
| Oxtail                                    | Use beef instead                                                                |
| Rabbit                                    | Use mean value of meat instead                                                  |
| Venison                                   | Use "Steak, reindeer" instead                                                   |
| Wild pig                                  | Use pork instead                                                                |
| <b>Eggs</b>                               |                                                                                 |
| Egg substitute                            | Use the mean value of "Egg, beaters Egg, scrambled" and "with milk Egg, whites" |
| <b>Cured meat</b>                         |                                                                                 |
| Beef luncheon meat                        | Use the mean value of cured meat instead                                        |
| Blood sausage                             | Use the mean value of cured meat instead                                        |
| <b>Organ meat</b>                         |                                                                                 |
| Brain                                     | Use the mean value of organ meat instead                                        |
| Chitterlings                              | Use the mean value of organ meat instead                                        |
| Giblets                                   | Use the mean value of organ meat instead                                        |
| Gizzard                                   | Use the mean value of organ meat instead                                        |
| Heart                                     | Use the mean value of organ meat instead                                        |

| Food Description                               | Substitute Information                                          |
|------------------------------------------------|-----------------------------------------------------------------|
| <b>(continued)</b>                             |                                                                 |
| Kidney                                         | Use the mean value of organ meat instead                        |
| Liver                                          | Use the mean value of organ meat instead                        |
| Stomach                                        | Use the mean value of organ meat instead                        |
| Sweetbreads                                    | Use the mean value of organ meat instead                        |
| Thymus                                         | Use the mean value of organ meat instead                        |
| Tongue                                         | Use the mean value of organ meat instead                        |
| Tripe                                          | Use the mean value of organ meat instead                        |
| <b>Poultry (chicken, turkey, other fowl)</b>   |                                                                 |
| Cornish game hen                               | Use the mean value of chicken instead                           |
| Dove                                           | Use the mean value of chicken instead                           |
| Duck                                           | Use the mean value of chicken instead                           |
| Goose                                          | Use the mean value of chicken instead                           |
| Ostrich                                        | Use the mean value of chicken instead                           |
| Pheasant                                       | Use the mean value of chicken instead                           |
| Quail                                          | Use the mean value of chicken instead                           |
| Turkey                                         | Use the mean value of chicken instead                           |
| <b>Beans and peas computed as protein food</b> |                                                                 |
| Miso                                           | Use the mean value of bean protein instead                      |
| Natto                                          | Use "soybean" instead                                           |
| Soybean flour                                  | Use "soybean" instead                                           |
| Soybean meal                                   | Use "soybean" instead                                           |
| Soy nuts                                       | Use the mean value of bean protein instead                      |
| <b>Seafood high in n-3 fatty acids</b>         |                                                                 |
| Anchovy                                        | Use the mean value of "seafood high in n-3 fatty acids" instead |

| Food Description                      | Substitute Information                                          |
|---------------------------------------|-----------------------------------------------------------------|
| <b>(continued)</b>                    |                                                                 |
| Barracuda                             | Use the mean value of "seafood high in n-3 fatty acids" instead |
| Caviar (roe)                          | Use the mean value of "seafood high in n-3 fatty acids" instead |
| Cisco                                 | Use the mean value of "seafood high in n-3 fatty acids" instead |
| Herring                               | Use the mean value of "seafood high in n-3 fatty acids" instead |
| Pompano                               | Use the mean value of "seafood high in n-3 fatty acids" instead |
| Ray                                   | Use the mean value of "seafood high in n-3 fatty acids" instead |
| Sardine                               | Use the mean value of "seafood high in n-3 fatty acids" instead |
| Sea bass                              | Use the mean value of "seafood high in n-3 fatty acids" instead |
| Shad                                  | Use the mean value of "seafood high in n-3 fatty acids" instead |
| Shark                                 | Use the mean value of "seafood high in n-3 fatty acids" instead |
| Squid                                 | Use the mean value of "seafood high in n-3 fatty acids" instead |
| Swordfish                             | Use the mean value of "seafood high in n-3 fatty acids" instead |
| Trout                                 | Use the mean value of "seafood high in n-3 fatty acids" instead |
| Whitefish                             | Use the mean value of "seafood high in n-3 fatty acids" instead |
| <b>Seafood low in n-3 fatty acids</b> |                                                                 |
| Abalone                               | Use the mean value of "seafood low in n-3 fatty acids" instead  |
| Carp                                  | Use the mean value of "seafood low in n-3 fatty acids" instead  |
| Catfish                               | Use the mean value of "seafood low in n-3 fatty acids" instead  |
| Crayfish                              | Use the mean value of "seafood low in n-3 fatty acids" instead  |
| Croaker                               | Use the mean value of "seafood low in n-3 fatty acids" instead  |
| Eel                                   | Use the mean value of "seafood low in n-3 fatty acids" instead  |
| Flounder                              | Use the mean value of "seafood low in n-3 fatty acids" instead  |
| Frog legs                             | Use the mean value of "seafood low in n-3 fatty acids" instead  |
| Haddock                               | Use the mean value of "seafood low in n-3 fatty acids" instead  |

| Food Description      | Substitute Information                                         |
|-----------------------|----------------------------------------------------------------|
| <b>(continued)</b>    |                                                                |
| Halibut               | Use the mean value of "seafood low in n-3 fatty acids" instead |
| Mullet                | Use the mean value of "seafood low in n-3 fatty acids" instead |
| Mussels               | Use the mean value of "seafood low in n-3 fatty acids" instead |
| Ocean perch           | Use the mean value of "seafood low in n-3 fatty acids" instead |
| Octopus               | Use the mean value of "seafood low in n-3 fatty acids" instead |
| Oyster                | Use the mean value of "seafood low in n-3 fatty acids" instead |
| Perch                 | Use the mean value of "seafood low in n-3 fatty acids" instead |
| Pike                  | Use the mean value of "seafood low in n-3 fatty acids" instead |
| Porgy                 | Use the mean value of "seafood low in n-3 fatty acids" instead |
| Scallop               | Use the mean value of "seafood low in n-3 fatty acids" instead |
| Scup                  | Use the mean value of "seafood low in n-3 fatty acids" instead |
| Snail                 | Use the mean value of "seafood low in n-3 fatty acids" instead |
| Snapper               | Use the mean value of "seafood low in n-3 fatty acids" instead |
| Sole                  | Use the mean value of "seafood low in n-3 fatty acids" instead |
| Sturgeon              | Use the mean value of "seafood low in n-3 fatty acids" instead |
| Turtle                | Use the mean value of "seafood low in n-3 fatty acids" instead |
| Whiting               | Use the mean value of "seafood low in n-3 fatty acids" instead |
| <b>Nuts and seeds</b> |                                                                |
| Almond butter         | Use the mean value of nuts instead                             |
| Almond paste          | Use the mean value of nuts instead                             |
| Cashew butter         | Use the mean value of nuts instead                             |
| Peanut flour          | Use peanuts instead                                            |
| Pumpkin seeds         | Use the mean value of nuts instead                             |
| Squash seeds          | Use the mean value of nuts instead                             |

| <b>Food Description</b>                     | <b>Substitute Information</b>                            |
|---------------------------------------------|----------------------------------------------------------|
| <b>(continued)</b>                          |                                                          |
| Sesame butter (tahini)                      | Use the mean value of nuts instead                       |
| Sesame paste                                | Use the sesame instead                                   |
| <b>Dairy</b>                                |                                                          |
| Milk, dry, all fat types, not reconstituted | NA                                                       |
| Milk, dry, all fat types, reconstituted     | NA                                                       |
| Milk, evaporated, all fat types             | Use "Milk, 1%; Milk, 2%" instead                         |
| Cheese, blue                                | Use the mean value of cheese instead                     |
| Cheese, brick                               | Use the mean value of cheese instead                     |
| Cheese, brie                                | Use the mean value of cheese instead                     |
| Cheese, camembert                           | Use the mean value of cheese instead                     |
| Cheese, cheddar                             | Use the mean value of cheese instead                     |
| Cheese, colby                               | Use the mean value of cheese instead                     |
| Cheese, cottage variable                    | Use the mean value of cheese instead                     |
| Cheese, cream, fat free                     | Use the mean value of cheese instead                     |
| Cheese, edam                                | Use the mean value of cheese instead                     |
| Cheese, feta                                | Use the mean value of cheese instead                     |
| Cheese, fontina                             | Use the mean value of cheese instead                     |
| Cheese, Mexican, blend, reduced fat         | Use "Cheese, Mozzarella, low moisture part skim" instead |
| Cheese, Mexican, queso anejo                | Use the mean value of cheese instead                     |
| Cheese, Mexican, queso asadero              | Use the mean value of cheese instead                     |
| Cheese, Mexican, queso chihuahua            | Use the mean value of cheese instead                     |
| Cheese, monterey                            | Use the mean value of cheese instead                     |
| Cheese, monterey, low fat                   | Use the mean value of cheese instead                     |

| Food Description                | Substitute Information                                   |
|---------------------------------|----------------------------------------------------------|
| <b>(continued)</b>              |                                                          |
| Cheese, muenster                | Use the mean value of cheese instead                     |
| Cheese, muenster, low fat       | Use "Cheese, Mozzarella, low moisture part skim" instead |
| Cheese, port de salut           | Use the mean value of cheese instead                     |
| Cheese, provolone               | Use the mean value of cheese instead                     |
| Cheese, provolone, reduced fat  | Use "Cheese, Mozzarella, low moisture part skim" instead |
| Cheese, queso fresco            | Use the mean value of cheese instead                     |
| Cheese, ricotta, part skim milk | Use "Cheese, Mozzarella, low moisture part skim" instead |
| <b>Oils</b>                     |                                                          |
| Cottonseed oil                  | Use mean value of oils instead                           |
| Fish oil                        | Use mean value of oils instead                           |
| Flaxseed oil                    | Use mean value of oils instead                           |
| Peanut oil                      | Use mean value of oils instead                           |
| Sesame oil                      | Use mean value of oils instead                           |
| Spreads                         | Use mean value of oils instead                           |
| Cottonseed oil                  | Use mean value of oils instead                           |
| Fish oil                        | Use mean value of oils instead                           |
| <b>Solid Fats</b>               |                                                          |
| Cocoa butter                    | Use mean value of solid fats instead                     |
| Cocoa fat                       | Use mean value of solid fats instead                     |
| Coconut cream                   | Use mean value of solid fats instead                     |
| Ghee                            | Use mean value of solid fats instead                     |
| Hydrogenated oils               | Use mean value of solid fats instead                     |

| Food Description                  | Substitute Information                                   |
|-----------------------------------|----------------------------------------------------------|
| <b>(continued)</b>                |                                                          |
| Lard                              | Use mean value of solid fats instead                     |
| Palm oil                          | Use mean value of solid fats instead                     |
| Tallow                            | Use mean value of solid fats instead                     |
| Shortening (animal and vegetable) | Use mean value of solid fats instead                     |
| <b>Add Sugars</b>                 |                                                          |
| Confectioners'sugar               | Use the mean value of "syrup (100%), with sugar" instead |
| Dextrose                          | Use "Sugar, refined, granulated" instead                 |
| Fructose                          | Use "Sugar, refined, granulated" instead                 |
| Fruit juice                       | Use the mean value of sugars                             |
| Fruit syrups                      | Use the mean value of "syrup (100%), with sugar" instead |
| Sorghum syrups                    | Use "Barley malt syrup, organic" instead                 |
| Granulated sugar                  | Sugar, refined, granulated                               |

**Supplementary Table 2 The mean and median antioxidant capacity per equivalent serving of the 30 categories foods**

| Main categories <sup>a</sup> | FPID/FPED categories                               | Mean Value<br>(mmol/serving) <sup>b</sup> | Median Value<br>(mmol/serving) <sup>c</sup> | Dietary intake servings<br>(Mean (SD)) <sup>d</sup> |
|------------------------------|----------------------------------------------------|-------------------------------------------|---------------------------------------------|-----------------------------------------------------|
| <b>Fruit</b>                 | Citrus, melons, and berries                        | 2.696                                     | 1.887                                       | 0.22 (0.63)                                         |
|                              | Other fruits                                       | 1.857                                     | 1.857                                       | 0.29 (0.61)                                         |
|                              | Fruit juice                                        | 1.182                                     | 0.483                                       | 0.25 (0.57)                                         |
| <b>Vegetables</b>            | Dark green vegetables                              | 1.572                                     | 0.590                                       | 0.09 (0.31)                                         |
|                              | Tomatoes                                           | 0.806                                     | 0.772                                       | 0.26 (0.38)                                         |
|                              | Other red and orange vegetables (exclude tomatoes) | 0.330                                     | 0.147                                       | 0.06 (0.19)                                         |
|                              | Potatoes (white potatoes)                          | 0.509                                     | 0.516                                       | 0.29 (0.51)                                         |
|                              | Other starchy vegetables (exclude white potatoes)  | 0.227                                     | 0.241                                       | 0.07 (0.23)                                         |
|                              | Other vegetables                                   | 1.182                                     | 0.483                                       | 0.40 (0.60)                                         |
|                              | Beans and peas computed as vegetables              | 0.561                                     | 0.665                                       | 0.11 (0.34)                                         |
| <b>Grains</b>                | Whole grains                                       | 0.173                                     | 0.108                                       | 0.54 (1.04)                                         |
|                              | Refined grains                                     | 0.043                                     | 0.017                                       | 5.04 (3.19)                                         |
| <b>Protein Foods</b>         | Meat (beef, veal, pork, lamb, game)                | 0.008                                     | 0.007                                       | 1.47 (2.36)                                         |
|                              | Cured meat                                         | 0.102                                     | 0.096                                       | 0.77 (1.49)                                         |
|                              | Organ meat                                         | 0.222                                     | 0.237                                       | 0.02 (0.31)                                         |
|                              | Poultry                                            | 0.049                                     | 0.037                                       | 1.33 (2.32)                                         |
|                              | Seafood high in n-3 fatty acids                    | 0.031                                     | 0.023                                       | 0.10 (0.74)                                         |
|                              | Seafood low in n-3 fatty acids                     | 0.031                                     | 0.023                                       | 0.37 (1.55)                                         |
|                              | Eggs                                               | 0.027                                     | 0.023                                       | 0.45 (0.84)                                         |

| Main categories <sup>a</sup> | FPID/FPED categories                      | Mean Value<br>(mmol/serving) <sup>b</sup> | Median Value<br>(mmol/serving) <sup>c</sup> | Dietary intake servings<br>(Mean (SD)) <sup>d</sup> |
|------------------------------|-------------------------------------------|-------------------------------------------|---------------------------------------------|-----------------------------------------------------|
| <b>(continued)</b>           |                                           |                                           |                                             |                                                     |
|                              | Soybean products                          | 0.056                                     | 0.056                                       | 0.04 (0.29)                                         |
|                              | Nuts and seeds                            | 0.426                                     | 0.106                                       | 0.22 (0.94)                                         |
|                              | Beans and peas computed as protein foods  | 0.140                                     | 0.166                                       | 0.45 (1.35)                                         |
| <b>Dairy</b>                 | Milk (include calcium fortified soy milk) | 0.148                                     | 0.110                                       | 0.73 (0.98)                                         |
|                              | Yogurt                                    | 0.098                                     | 0.098                                       | 0.03 (0.14)                                         |
|                              | Cheese                                    | 0.162                                     | 0.028                                       | 0.57 (0.84)                                         |
| <b>Oils</b>                  | Oils                                      | 0.668                                     | 0.410                                       | 16.29 (15.89)                                       |
| <b>Solid Fats</b>            | Solid fats                                | 0.339                                     | 0.070                                       | 31.51 (19.98)                                       |
| <b>Added Sugars</b>          | Added sugars                              | 0.008                                     | 0.009                                       | 12.07 (10.40)                                       |
| <b>Alcoholic Drinks</b>      | Alcoholic drinks                          | 1.326                                     | 1.960                                       | 0.19 (0.96)                                         |

<sup>a</sup> Food classification was defined by of USDA's Food Patterns Equivalents Database 2015-2016 (FPED 2015-2016). <sup>b</sup> Mean and <sup>c</sup> median antioxidant capacity value of the food components included in the different food categories defined by the FPED, respectively. <sup>d</sup> The FPED dietary intake servings were calculated by energy adjustment.

**Supplementary Table 3 Antioxidant capacity based on food sources at breakfast, lunch, and dinner, respectively**

| Main Components <sup>a</sup> | FPID/FPED Components                               | Energy-adjusted antioxidant capacity intake<br>(Mean (SD)) * |             |             |             |
|------------------------------|----------------------------------------------------|--------------------------------------------------------------|-------------|-------------|-------------|
|                              |                                                    | Total                                                        | Breakfast   | Lunch       | Dinner      |
| <b>Fruit</b>                 | Citrus, melons, and berries                        | 0.46 (1.18)                                                  | 0.20 (0.82) | 0.12 (0.80) | 0.11 (0.75) |
|                              | Other fruits                                       | 0.45 (0.97)                                                  | 0.19 (0.61) | 0.12 (0.52) | 0.17 (0.62) |
|                              | Fruit juice                                        | 0.28 (0.64)                                                  | 0.15 (0.44) | 0.07 (0.32) | 0.06 (0.29) |
| <b>Vegetables</b>            | Dark green vegetables                              | 0.14 (0.47)                                                  | 0.01 (0.11) | 0.09 (0.37) | 0.04 (0.26) |
|                              | Tomatoes                                           | 0.20 (0.30)                                                  | 0.02 (0.09) | 0.11 (0.23) | 0.07 (0.17) |
|                              | Other red and orange vegetables (exclude tomatoes) | 0.02 (0.06)                                                  | 0.00 (0.02) | 0.01 (0.05) | 0.01 (0.04) |
|                              | Potatoes (white potatoes)                          | 0.14 (0.26)                                                  | 0.01 (0.08) | 0.08 (0.20) | 0.05 (0.14) |
|                              | Other starchy vegetables (exclude white potatoes)  | 0.02 (0.05)                                                  | 0.00 (0.02) | 0.01 (0.04) | 0.00 (0.03) |
|                              | Other vegetables                                   | 0.46 (0.68)                                                  | 0.03 (0.18) | 0.27 (0.53) | 0.16 (0.39) |
|                              | Beans and peas computed as vegetables              | 0.06 (0.18)                                                  | 0.01 (0.07) | 0.03 (0.13) | 0.02 (0.10) |
| <b>Grains</b>                | Whole grains                                       | 0.09 (0.18)                                                  | 0.05 (0.11) | 0.02 (0.09) | 0.02 (0.08) |
|                              | Refined grains                                     | 0.21 (0.14)                                                  | 0.05 (0.07) | 0.09 (0.10) | 0.07 (0.08) |
| <b>Protein Foods</b>         | Meat (beef, veal, pork, lamb, game)                | 0.01 (0.02)                                                  | 0.00 (0.00) | 0.01 (0.02) | 0.00 (0.01) |
|                              | Cured meat                                         | 0.08 (0.15)                                                  | 0.02 (0.06) | 0.03 (0.09) | 0.03 (0.10) |
|                              | Organ meat                                         | 0.00 (0.07)                                                  | 0.00 (0.02) | 0.00 (0.05) | 0.00 (0.03) |
|                              | Poultry                                            | 0.07 (0.11)                                                  | 0.00 (0.03) | 0.04 (0.09) | 0.02 (0.07) |
|                              | Seafood high in n-3 fatty acids                    | 0.00 (0.02)                                                  | 0.00 (0.00) | 0.00 (0.02) | 0.00 (0.01) |
|                              | Seafood low in n-3 fatty acids                     | 0.01 (0.05)                                                  | 0.00 (0.01) | 0.01 (0.04) | 0.00 (0.02) |
|                              | Eggs                                               | 0.01 (0.02)                                                  | 0.01 (0.02) | 0.00 (0.01) | 0.00 (0.01) |

| Main Components <sup>a</sup> | FPID/FPED Components                      | Energy-adjusted antioxidant capacity intake<br>(Mean (SD)) * |             |             |             |
|------------------------------|-------------------------------------------|--------------------------------------------------------------|-------------|-------------|-------------|
|                              |                                           | Total                                                        | Breakfast   | Lunch       | Dinner      |
| <b>(continued)</b>           |                                           |                                                              |             |             |             |
|                              | Soybean products                          | 0.00 (0.02)                                                  | 0.00 (0.01) | 0.00 (0.01) | 0.00 (0.01) |
|                              | Nuts and seeds                            | 0.08 (0.34)                                                  | 0.02 (0.17) | 0.02 (0.20) | 0.04 (0.24) |
|                              | Beans and peas computed as protein foods  | 0.06 (0.18)                                                  | 0.01 (0.07) | 0.03 (0.13) | 0.02 (0.10) |
| <b>Dairy</b>                 | Milk (include calcium fortified soy milk) | 0.10 (0.14)                                                  | 0.06 (0.09) | 0.02 (0.07) | 0.02 (0.06) |
|                              | Yogurt                                    | 0.00 (0.01)                                                  | 0.00 (0.01) | 0.00 (0.01) | 0.00 (0.01) |
|                              | Cheese                                    | 0.09 (0.13)                                                  | 0.01 (0.04) | 0.05 (0.10) | 0.04 (0.08) |
| <b>Oils</b>                  | Oils                                      | 0.11 (0.10)                                                  | 0.02 (0.04) | 0.05 (0.07) | 0.04 (0.06) |
| <b>Solid Fats</b>            | Solid fats                                | 0.10 (0.07)                                                  | 0.03 (0.04) | 0.05 (0.05) | 0.03 (0.04) |
| <b>Added Sugars</b>          | Added sugars                              | 0.08 (0.07)                                                  | 0.02 (0.03) | 0.03 (0.05) | 0.03 (0.04) |
| <b>Alcoholic Drinks</b>      | Alcoholic drinks                          | 0.18 (0.93)                                                  | 0.01 (0.20) | 0.16 (0.98) | 0.03 (0.38) |

<sup>a</sup> Food classification was defined by of USDA's Food Patterns Equivalents Database 2015-2016 (FPED 2015-2016).

\* DAC was obtained by multiplying antioxidant capacity per serving and energy-adjusted dietary intake servings.

**Supplementary Table 4 Baseline characteristics of the study population, categorized by quintiles of total DAC**

| Characteristic                         | Total DAC   |             |             |             |             | P value |
|----------------------------------------|-------------|-------------|-------------|-------------|-------------|---------|
|                                        | Q1          | Q2          | Q3          | Q4          | Q5          |         |
| <b>Patients, n</b>                     | 11214       | 11213       | 11213       | 11213       | 11213       |         |
| <b>Age ± years</b>                     | 40.22±0.28  | 44.68±0.33  | 46.82±0.30  | 48.88±0.31  | 48.92±0.39  | <0.001  |
| <b>Female</b>                          | 4662 (41.6) | 6053 (54.0) | 6047 (53.9) | 5984 (53.4) | 5187 (46.3) | <0.001  |
| <b>Race/ethnicity</b>                  |             |             |             |             |             | <0.001  |
| Mexican American                       | 1477 (13.2) | 2002 (17.9) | 2022 (18.0) | 2030 (18.1) | 1783 (15.9) |         |
| Non-Hispanic Black                     | 3173 (28.3) | 2531 (22.6) | 2172 (19.4) | 1880 (16.8) | 1655 (14.8) |         |
| Non-Hispanic White                     | 5073 (45.2) | 4968 (44.3) | 5128 (45.7) | 5500 (49.1) | 6128 (54.7) |         |
| Other Hispanic                         | 777 (6.9)   | 910 (8.1)   | 957 (8.5)   | 834 (7.4)   | 671 (6.0)   |         |
| Other                                  | 714 (6.4)   | 802 (7.2)   | 934 (8.3)   | 969 (8.6)   | 976 (8.7)   |         |
| <b>Education</b>                       |             |             |             |             |             | < 0.001 |
| Less than 9th grade                    | 872 (7.8)   | 1372 (12.2) | 1404 (12.5) | 1169 (10.4) | 967 (8.6)   |         |
| 9-11th grade                           | 2044 (18.2) | 1772 (15.8) | 1419 (12.7) | 1268 (11.3) | 1074 (9.6)  |         |
| College graduate or above              | 1586 (14.2) | 1972 (17.6) | 2520 (22.5) | 3201 (28.6) | 4107 (36.7) |         |
| High school graduate/GED or equivalent | 3076 (27.4) | 2759 (24.6) | 2591 (23.1) | 2292 (20.5) | 1968 (17.6) |         |
| Some college or AA degree              | 3629 (32.4) | 3326 (29.7) | 3266 (29.2) | 3270 (29.2) | 3084 (27.5) |         |
| <b>Income</b>                          |             |             |             |             |             | <0.001  |
| \$ 0 to \$ 19,999                      | 2954 (26.3) | 2856 (25.5) | 2708 (24.2) | 2340 (20.9) | 1971 (17.6) |         |
| \$20,000 to \$44,999                   | 3973 (35.4) | 4003 (35.7) | 3755 (33.5) | 3525 (31.4) | 3400 (30.3) |         |
| \$45,000 to \$74,999                   | 2194 (19.6) | 2105 (18.8) | 2157 (19.2) | 2194 (19.6) | 2182 (19.5) |         |
| \$75,000 to \$99,999                   | 1428 (12.7) | 1458 (13.0) | 1659 (14.8) | 2051 (18.3) | 2430 (21.7) |         |
| \$100,000 and over                     | 665 (5.9)   | 791 (7.1)   | 934 (8.3)   | 1103 (9.8)  | 1230 (11.0) |         |
| <b>BMI (kg/m<sup>2</sup> )</b>         | 28.52±0.12  | 29.14±0.12  | 28.84±0.12  | 28.32±0.14  | 27.43±0.12  | <0.001  |
| <b>Alcohol intake (g/day)</b>          | 14.06±0.65  | 6.00±0.36   | 6.03±0.34   | 7.59±0.32   | 15.68±0.53  | <0.001  |

| Characteristic                         | Total DAC     |               |               |               |               | P value |
|----------------------------------------|---------------|---------------|---------------|---------------|---------------|---------|
|                                        | Q1            | Q2            | Q3            | Q4            | Q5            |         |
| <b>(continued)</b>                     |               |               |               |               |               |         |
| <b>Smoking status</b>                  |               |               |               |               |               | <0.001  |
| Never smoked                           | 5077 (45.3)   | 6012 (53.6)   | 6335 (56.5)   | 6588 (58.8)   | 6497 (57.9)   |         |
| Past smoker                            | 2142 (19.1)   | 2653 (23.7)   | 2844 (25.4)   | 3085 (27.5)   | 3350 (29.9)   |         |
| Current smoker                         | 3995 (35.6)   | 2548 (22.7)   | 2034 (18.1)   | 1540 (13.7)   | 1366 (12.2)   |         |
| <b>Physical activity (METs-h/week)</b> | 11.51±0.14    | 11.74±0.13    | 11.27±0.13    | 10.87±0.15    | 10.28±0.14    | <0.001  |
| <b>Dietary energy intake (kcal )</b>   | 2445.54±17.80 | 1921.01±15.84 | 1976.51±15.62 | 2062.22±15.27 | 2249.79±17.51 | <0.001  |
| <b>Adherence to HEI-2015 score</b>     | 42.43±0.21    | 44.34±0.24    | 49.87±0.20    | 54.94±0.24    | 60.38±0.23    | <0.001  |
| <b>Dietary supplement use (%)</b>      | 5753 (51.3)   | 6120 (54.6)   | 6526 (58.2)   | 7088 (63.2)   | 7559 (67.4)   | <0.001  |
| <b>Serum CRP level (mg/dL)</b>         | 5.46±0.23     | 5.48±0.21     | 5.34±0.21     | 5.25±0.24     | 4.30±0.23     | 0.001   |
| <b>Hypertension</b>                    | 3171 (28.3)   | 3923 (35.0)   | 3918 (34.9)   | 4014 (35.8)   | 3559 (31.7)   | <0.001  |
| <b>Diabetes</b>                        | 1444 (12.9)   | 1880 (16.8)   | 2119 (18.9)   | 1986 (17.7)   | 1541 (13.7)   | <0.001  |
| <b>Cancer</b>                          | 706 (6.3)     | 923 (8.2)     | 1160 (10.3)   | 1113 (9.9)    | 1175 (10.5)   | <0.001  |
| <b>Hyperlipidaemia</b>                 | 1302 (11.6)   | 1809 (16.1)   | 2105 (18.8)   | 2278 (20.3)   | 1989 (17.7)   | <0.001  |
| <b>CVD</b>                             | 2830 (25.2)   | 3477 (31.0)   | 3673 (32.8)   | 3664 (32.7)   | 3406 (30.4)   | <0.001  |

Abbreviations: DAC, dietary total antioxidant capacity; HEI-2015, Healthy Eating Index 2015; BMI, body mass index; CVD, cardiovascular disease; CRP, C-reactive protein.

Continuous variables were adjusted for survey weights of NHANES. Categorical variables were unweighted. One-way ANOVA for continuous variables and chi-square test of independence test for categorical variables were performed.

**Supplementary Table 5 Baseline characteristics of the study population, categorized by quintiles of DAC at dinner**

| Characteristic                         | DAC at dinner |             |             |             |             | P value |
|----------------------------------------|---------------|-------------|-------------|-------------|-------------|---------|
|                                        | Q1            | Q2          | Q3          | Q4          | Q5          |         |
| <b>Patients, n</b>                     | 11214         | 11213       | 11213       | 11213       | 11213       |         |
| <b>Age (years)</b>                     | 44.33±0.34    | 47.72±0.28  | 45.65±0.28  | 45.64±0.33  | 46.53±0.37  | <0.001  |
| <b>Female</b>                          | 3882 (34.6)   | 6324 (56.4) | 6099 (54.4) | 6022 (53.7) | 5606 (50.0) | <0.001  |
| <b>Race/ethnicity</b>                  |               |             |             |             |             | <0.001  |
| Mexican American                       | 1807 (16.1)   | 1630 (14.5) | 1659 (14.8) | 1994 (17.8) | 2224 (19.8) |         |
| Non-Hispanic Black                     | 2772 (24.7)   | 2819 (25.1) | 2119 (18.9) | 1946 (17.4) | 1755 (15.7) |         |
| Non-Hispanic White                     | 4942 (44.1)   | 5062 (45.1) | 5881 (52.4) | 5418 (48.3) | 5494 (49.0) |         |
| Other Hispanic                         | 1080 (9.6)    | 972 (8.7)   | 691 (6.2)   | 736 (6.6)   | 670 (6.0)   |         |
| Other                                  | 613 (5.5)     | 730 (6.5)   | 863 (7.7)   | 1119 (10.0) | 1070 (9.5)  |         |
| <b>Education</b>                       |               |             |             |             |             | <0.001  |
| Less than 9th grade                    | 1090 (9.7)    | 1416 (12.6) | 1003 (8.9)  | 1100 (9.8)  | 1175 (10.5) |         |
| 9-11th grade                           | 1839 (16.4)   | 1844 (16.5) | 1477 (13.2) | 1248 (11.1) | 1169 (10.4) |         |
| College graduate or above              | 1968 (17.6)   | 2026 (18.1) | 2599 (23.2) | 3124 (27.9) | 3669 (32.8) |         |
| High school graduate/GED or equivalent | 2847 (25.4)   | 2734 (24.4) | 2702 (24.1) | 2361 (21.1) | 2042 (18.2) |         |
| Some college or AA degree              | 3456 (30.9)   | 3178 (28.4) | 3426 (30.6) | 3373 (30.1) | 3142 (28.1) |         |
| <b>Income</b>                          |               |             |             |             |             | <0.001  |
| \$ 0 to \$ 19,999                      | 2762 (24.6)   | 3081 (27.5) | 2450 (21.8) | 2362 (21.1) | 2174 (19.4) |         |
| \$20,000 to \$44,999                   | 3875 (34.6)   | 3951 (35.2) | 3775 (33.7) | 3554 (31.7) | 3501 (31.2) |         |
| \$45,000 to \$74,999                   | 2242 (20.0)   | 2019 (18.0) | 2180 (19.4) | 2201 (19.6) | 2190 (19.5) |         |
| \$75,000 to \$99,999                   | 1570 (14.0)   | 1463 (13.0) | 1856 (16.6) | 1932 (17.2) | 2205 (19.7) |         |
| \$100,000 and Over                     | 765 (6.8)     | 699 (6.2)   | 952 (8.5)   | 1164 (10.4) | 1143 (10.2) |         |
| <b>BMI (kg/m<sup>2</sup>)</b>          | 28.78±0.13    | 28.66±0.12  | 28.48±0.13  | 28.41±0.12  | 27.87±0.12  | <0.001  |
| <b>Alcohol intake (g/day)</b>          | 15.85±0.68    | 8.11±0.41   | 8.81±0.48   | 7.75±0.32   | 9.99±0.44   | <0.001  |

| Characteristic                         | DAC at dinner |               |               |               |               | P value |
|----------------------------------------|---------------|---------------|---------------|---------------|---------------|---------|
|                                        | Q1            | Q2            | Q3            | Q4            | Q5            |         |
| <b>(continued)</b>                     |               |               |               |               |               |         |
| <b>Smoking status</b>                  |               |               |               |               |               | <0.001  |
| Never smoked                           | 5216 (46.5)   | 5783 (51.6)   | 6156 (54.9)   | 6701 (59.8)   | 6653 (59.3)   |         |
| Past smoker                            | 2728 (24.3)   | 2798 (25.0)   | 2797 (24.9)   | 2700 (24.1)   | 3051 (27.2)   |         |
| Current smoker                         | 3270 (29.2)   | 2632 (23.5)   | 2260 (20.2)   | 1812 (16.2)   | 1509 (13.5)   |         |
| <b>Physical activity (METs-h/week)</b> | 11.54±0.11    | 11.66±0.13    | 11.21±0.13    | 10.87±0.14    | 10.42±0.13    | <0.001  |
| <b>Dietary energy intake (kcal)</b>    | 2588.78±13.17 | 1791.75±17.81 | 2019.66±17.97 | 2091.14±16.46 | 2196.42±17.45 | <0.001  |
| <b>Adherence to HEI-2015 score</b>     | 47.93±0.27    | 47.78±0.31    | 48.31±0.27    | 51.13±0.26    | 57.87±0.29    | <0.001  |
| <b>Dietary supplement use (%)</b>      | 6211 (55.4)   | 6455 (57.6)   | 6597 (58.8)   | 6650 (59.3)   | 7133 (63.6)   | <0.001  |
| <b>Serum CRP level (mg/dL)</b>         | 5.40±0.21     | 5.24±0.22     | 5.17±0.21     | 5.24±0.18     | 4.75±0.19     | 0.12    |
| <b>Hypertension</b>                    | 3435 (30.6)   | 4256 (38.0)   | 3749 (33.4)   | 3585 (32.0)   | 3560 (31.7)   | <0.001  |
| <b>Diabetes</b>                        | 1573 (14.0)   | 2094 (18.7)   | 1850 (16.5)   | 1768 (15.8)   | 1685 (15.0)   | <0.001  |
| <b>Cancer</b>                          | 871 (7.8)     | 1099 (9.8)    | 1108 (9.9)    | 993 (8.9)     | 1006 (9.0)    | <0.001  |
| <b>Hyperlipidaemia</b>                 | 1657 (14.8)   | 2081 (18.6)   | 1913 (17.1)   | 1826 (16.3)   | 2006 (17.9)   | <0.001  |
| <b>CVD</b>                             | 3134 (27.9)   | 3946 (35.2)   | 3580 (31.9)   | 3186 (28.4)   | 3204 (28.6)   | <0.001  |

Abbreviations: DAC, dietary total antioxidant capacity; HEI-2015, Healthy Eating Index 2015; BMI, body mass index; CVD, cardiovascular disease; CRP, C-reactive protein.

Continuous variables were adjusted for survey weights of NHANES. Categorical variables were unweighted. One-way ANOVA for continuous variables and chi-square test of independence test for categorical variables were performed.

**Supplementary Table 6 Baseline characteristics of the study population, categorized by the  $\Delta$  DAC**

| Characteristic                         | $\Delta$ DAC <sup>a</sup> |             |             |             |             | P value |
|----------------------------------------|---------------------------|-------------|-------------|-------------|-------------|---------|
|                                        | Q1                        | Q2          | Q3          | Q4          | Q5          |         |
| <b>Patients, n</b>                     | 11,214                    | 11,213      | 11,213      | 11,213      | 11,213      |         |
| <b>Age (years)</b>                     | 48.88±0.39                | 47.80±0.35  | 45.55±0.29  | 44.01±0.30  | 44.24±0.33  | < 0.001 |
| <b>Female</b>                          | 4053 (36.6)               | 6103 (55.3) | 6141 (55.5) | 6195 (56.0) | 5212 (47.1) | <0.001  |
| <b>Race/ethnicity</b>                  |                           |             |             |             |             | <0.001  |
| Mexican American                       | 2169 (19.3)               | 1761 (15.7) | 1421 (12.7) | 1795 (16.0) | 2168 (19.3) |         |
| Non-Hispanic Black                     | 2006 (17.9)               | 2591 (23.1) | 2755 (24.6) | 2169 (19.3) | 1890 (16.9) |         |
| Non-Hispanic White                     | 5130 (45.7)               | 5290 (47.2) | 5476 (48.8) | 5594 (49.9) | 5307 (47.3) |         |
| Other Hispanic                         | 1259 (11.2)               | 857 (7.6)   | 662 (5.9)   | 674 (6.0)   | 697 (6.2)   |         |
| Other                                  | 650 (5.8)                 | 714 (6.4)   | 899 (8.0)   | 981 (8.7)   | 1151 (10.3) |         |
| <b>Education</b>                       |                           |             |             |             |             | < 0.001 |
| Less than 9th grade                    | 1360 (12.1)               | 1326 (11.8) | 961 (8.6)   | 1003 (8.9)  | 1134 (10.1) |         |
| 9-11th grade                           | 1469 (13.1)               | 1734 (15.5) | 1763 (15.7) | 1361 (12.1) | 1250 (11.2) |         |
| College graduate or above              | 2918 (26.0)               | 2271 (20.3) | 2234 (19.9) | 2654 (23.7) | 3309 (29.5) |         |
| High school graduate/GED or equivalent | 2316 (20.7)               | 2653 (23.7) | 2818 (25.2) | 2690 (24.0) | 2209 (19.7) |         |
| Some college or AA degree              | 3139 (28.0)               | 3214 (28.7) | 3425 (30.6) | 3500 (31.2) | 3297 (29.4) |         |
| <b>Income</b>                          |                           |             |             |             |             | < 0.001 |
| \$ 0 to \$ 19,999                      | 2505 (22.3)               | 2882 (25.7) | 2850 (25.4) | 2425 (21.6) | 2167 (19.3) |         |
| \$20,000 to \$44,999                   | 3797 (33.9)               | 3776 (33.7) | 3765 (33.6) | 3660 (32.6) | 3658 (32.6) |         |
| \$45,000 to \$74,999                   | 2187 (19.5)               | 2123 (18.9) | 2149 (19.2) | 2193 (19.6) | 2180 (19.4) |         |
| \$75,000 to \$99,999                   | 1876 (16.7)               | 1628 (14.5) | 1600 (14.3) | 1870 (16.7) | 2052 (18.3) |         |
| \$100,000 and Over                     | 849 (7.6)                 | 804 (7.2)   | 849 (7.6)   | 1065 (9.5)  | 1156 (10.3) |         |
| <b>BMI (kg/m<sup>2</sup>)</b>          | 27.93±0.13                | 28.64±0.12  | 28.83±0.16  | 28.50±0.13  | 28.22±0.12  | 0.110   |
| <b>Alcohol intake (g/day)</b>          | 9.53±0.48                 | 10.44±0.51  | 10.05±0.52  | 8.96±0.41   | 11.08±0.45  | <0.001  |

| Characteristic                         | $\Delta$ DAC <sup>a</sup> |               |               |               |               | P value |
|----------------------------------------|---------------------------|---------------|---------------|---------------|---------------|---------|
|                                        | Q1                        | Q2            | Q3            | Q4            | Q5            |         |
| <b>(continued)</b>                     |                           |               |               |               |               |         |
| <b>Smoking status</b>                  |                           |               |               |               |               | <0.001  |
| Never smoked                           | 6548 (58.4)               | 5797 (51.7)   | 5549 (49.5)   | 6134 (54.7)   | 6481 (57.8)   |         |
| Past smoker                            | 3105 (27.7)               | 2938 (26.2)   | 2617 (23.3)   | 2583 (23.0)   | 2831 (25.2)   |         |
| Current smoker                         | 1561 (13.9)               | 2478 (22.1)   | 3047 (27.2)   | 2496 (22.3)   | 1901 (17.0)   |         |
| <b>Physical activity (METs-h/week)</b> | 10.89±0.13                | 11.50±0.15    | 11.64±0.14    | 10.97±0.14    | 10.65±0.13    | <0.001  |
| <b>Dietary energy intake (kcal)</b>    | 2240.88±18.83             | 2145.52±16.39 | 1912.36±13.61 | 2113.68±17.24 | 2268.24±18.28 | <0.001  |
| <b>Adherence to HEI-2015 score</b>     | 56.73±0.21                | 49.15±0.30    | 46.78±0.28    | 47.66±0.30    | 53.77±0.27    | <0.001  |
| <b>Dietary supplement use (%)</b>      | 7119 (63.5)               | 6530 (58.2)   | 6262 (55.8)   | 6447 (57.5)   | 6688 (59.6)   | <0.001  |
| <b>Serum CRP level (mg/dL)</b>         | 4.66±0.21                 | 5.63±0.23     | 5.51±0.24     | 5.06±0.19     | 4.92±0.21     | 0.002   |
| <b>Hypertension</b>                    | 3774 (33.7)               | 4081 (36.4)   | 3848 (34.3)   | 3500 (31.2)   | 3382 (30.2)   | <0.001  |
| <b>Diabetes</b>                        | 1754 (15.6)               | 2048 (18.3)   | 1860 (16.6)   | 1694 (15.1)   | 1614 (14.4)   | <0.001  |
| <b>Cancer</b>                          | 1192 (10.6)               | 1117 (10.0)   | 1055 (9.4)    | 875 (7.8)     | 838 (7.5)     | <0.001  |
| <b>Hyperlipidaemia</b>                 | 1995 (17.8)               | 2129 (19.0)   | 1866 (16.6)   | 1681 (15.0)   | 1812 (16.2)   | <0.001  |
| <b>CVD</b>                             | 3606 (32.2)               | 3861 (34.4)   | 3584 (32.0)   | 3087 (27.5)   | 2912 (26.0)   | <0.001  |

Abbreviations: DAC, dietary total antioxidant capacity; HEI-2015, Healthy Eating Index 2015; BMI, body mass index; CVD, cardiovascular disease; CRP, C-reactive protein.

Continuous variables were adjusted for survey weights of NHANES. Categorical variables were unweighted. One-way ANOVA for continuous variables and chi-square test of independence test for categorical variables were performed.

<sup>a</sup>  $\Delta$  equals dinner DAC minus breakfast DAC.

**Supplementary Table 7 Associations of all-cause mortality with quintiles of total, breakfast, lunch, dinner, and  $\Delta$  DAC**

| Exposure                 | Case/N     | Model 1           |         | Model 2           |         | Model 3           |         |
|--------------------------|------------|-------------------|---------|-------------------|---------|-------------------|---------|
|                          |            | HR (95% CI)       | P value | HR (95% CI)       | P value | HR (95% CI)       | P value |
| <b>Total DAC</b>         |            |                   |         |                   |         |                   |         |
| Continuous total DAC     | 8566/56066 | 0.93 (0.91, 0.94) | <0.001  | 0.95 (0.94, 0.97) | <0.001  | 0.96 (0.95, 0.98) | <0.001  |
| Quintile 1               | 1278/11214 | 1.00 (Reference)  |         | 1.00 (Reference)  |         | 1.00 (Reference)  |         |
| Quintile 2               | 1613/11213 | 0.75 (0.65, 0.87) |         | 0.81 (0.69, 0.94) |         | 0.82 (0.70, 0.95) |         |
| Quintile 3               | 1896/11213 | 0.73 (0.64, 0.84) |         | 0.82 (0.72, 0.95) |         | 0.83 (0.71, 0.95) |         |
| Quintile 4               | 1896/11213 | 0.59 (0.51, 0.68) |         | 0.70 (0.61, 0.81) |         | 0.74 (0.63, 0.85) |         |
| Quintile 5               | 1883/11213 | 0.48 (0.43, 0.54) | <0.001* | 0.62 (0.54, 0.70) | <0.001* | 0.66 (0.57, 0.76) | <0.001* |
| <b>Breakfast DAC</b>     |            |                   |         |                   |         |                   |         |
| Continuous breakfast DAC | 8566/56066 | 0.93 (0.91, 0.95) | <0.001  | 0.98 (0.96, 1.00) | 0.049   | 1.00 (0.98, 1.02) | 0.777   |
| Quintile 1               | 929/11214  | 1.00 (Reference)  |         | 1.00 (Reference)  |         | 1.00 (Reference)  |         |
| Quintile 2               | 1470/11213 | 0.93 (0.80, 1.08) |         | 0.91 (0.79, 1.06) |         | 0.92 (0.79, 1.07) |         |
| Quintile 3               | 1974/11213 | 0.86 (0.76, 0.98) |         | 0.87 (0.75, 1.00) |         | 0.87 (0.75, 1.01) |         |
| Quintile 4               | 1914/11213 | 0.81 (0.70, 0.93) |         | 0.91 (0.78, 1.06) |         | 0.93 (0.79, 1.08) |         |
| Quintile 5               | 2279/11213 | 0.74 (0.64, 0.85) | <0.001* | 0.89 (0.77, 1.03) | 0.267*  | 0.96 (0.82, 1.12) | 0.976*  |
| <b>Lunch DAC</b>         |            |                   |         |                   |         |                   |         |
| Continuous lunch DAC     | 8566/56066 | 0.93 (0.92, 0.95) | <0.001  | 0.96 (0.94, 0.98) | <0.001  | 0.96 (0.94, 0.99) | 0.002   |
| Quintile 1               | 1227/11214 | 1.00 (Reference)  |         | 1.00 (Reference)  |         | 1.00 (Reference)  |         |
| Quintile 2               | 1788/11213 | 1.14 (1.01, 1.28) |         | 1.05 (0.93, 1.19) |         | 1.00 (0.89, 1.13) |         |
| Quintile 3               | 1828/11213 | 1.00 (0.89, 1.14) |         | 1.00 (0.88, 1.14) |         | 0.97 (0.86, 1.10) |         |
| Quintile 4               | 1967/11213 | 0.95 (0.84, 1.08) |         | 1.00 (0.88, 1.14) |         | 0.97 (0.85, 1.10) |         |
| Quintile 5               | 1756/11213 | 0.77 (0.69, 0.86) | <0.001* | 0.88 (0.78, 1.00) | 0.023*  | 0.88 (0.77, 1.01) | 0.054*  |

| Exposure              | Case/N     | Model 1           |         | Model 2           |         | Model 3           |         |
|-----------------------|------------|-------------------|---------|-------------------|---------|-------------------|---------|
|                       |            | HR (95% CI)       | P value | HR (95% CI)       | P value | HR (95% CI)       | P value |
| <b>(continued)</b>    |            |                   |         |                   |         |                   |         |
| <b>Dinner DAC</b>     |            |                   |         |                   |         |                   |         |
| Continuous dinner DAC | 8566/56066 | 0.90 (0.88, 0.93) | <0.001  | 0.95 (0.92, 0.98) | <0.001  | 0.95 (0.92, 0.98) | 0.001   |
| Quintile 1            | 1537/11214 | 1.00 (Reference)  |         | 1.00 (Reference)  |         | 1.00 (Reference)  |         |
| Quintile 2            | 2103/11213 | 0.97 (0.86, 1.10) |         | 0.95 (0.84, 1.08) |         | 0.91 (0.81, 1.03) |         |
| Quintile 3            | 1795/11213 | 0.88 (0.78, 0.99) |         | 0.93 (0.83, 1.04) |         | 0.87 (0.78, 0.97) |         |
| Quintile 4            | 1568/11213 | 0.79 (0.69, 0.91) |         | 0.88 (0.77, 1.01) |         | 0.83 (0.72, 0.95) |         |
| Quintile 5            | 1563/11213 | 0.67 (0.58, 0.77) | <0.001* | 0.79 (0.69, 0.90) | <0.001* | 0.76 (0.67, 0.87) | <0.001* |
| <b>Δ DAC</b>          |            |                   |         |                   |         |                   |         |
| Continuous Δ DAC      | 8566/56066 | 0.99 (0.98, 1.01) | 0.393   | 0.99 (0.97, 1.00) | 0.105   | 0.98 (0.97, 1.00) | 0.036   |
| Quintile 1            | 2144/11214 | 1.00 (Reference)  |         | 1.00 (Reference)  |         | 1.00 (Reference)  |         |
| Quintile 2            | 2005/11213 | 1.16 (1.04, 1.30) |         | 1.04 (0.93, 1.15) |         | 0.99 (0.90, 1.10) |         |
| Quintile 3            | 1779/11213 | 1.28 (1.13, 1.44) |         | 1.10 (0.98, 1.23) |         | 1.03 (0.92, 1.17) |         |
| Quintile 4            | 1364/11213 | 1.04 (0.93, 1.16) |         | 0.96 (0.87, 1.07) |         | 0.91 (0.82, 1.01) |         |
| Quintile 5            | 1274/11213 | 0.87 (0.76, 0.99) | 0.022*  | 0.85 (0.75, 0.97) | 0.008*  | 0.84 (0.74, 0.96) | 0.003*  |

Abbreviations: HRs, hazard ratios; CIs, confidence intervals; DAC, dietary total antioxidant capacity; HEI-2015, Healthy Eating Index 2015; BMI, body mass index; CVD, cardiovascular disease.

\* P for trend across the quintile of DAC. HR (95%CI) was estimated by weighted Cox regression analyses. Δ equals dinner DAC minus breakfast DAC.

Model 1 adjusted for, age, sex, and race.

Model 2 further adjusted for education, family income, dietary energy intake, alcohol consumption per day, smoking status, physical activity, and BMI.

Model 3 further adjusted for diabetes, hypertension, CVD, cancer, hyperlipidaemia, adherence to HEI-2015 score, and dietary supplement use.

Models for breakfast DAC, lunch DAC, and dinner DAC were further adjusted except for the one that defined the group.

**Supplementary Table 8 Associations of CVD mortality with quintiles of total, breakfast, lunch, dinner, and Δ DAC**

| Exposure                 | Case/N     | Model 1           |         | Model 2           |         | Model 3           |         |
|--------------------------|------------|-------------------|---------|-------------------|---------|-------------------|---------|
|                          |            | HR (95% CI)       | P value | HR (95% CI)       | P value | HR (95% CI)       | P value |
| <b>Total DAC</b>         |            |                   |         |                   |         |                   |         |
| Continuous total DAC     | 2196/56066 | 0.92 (0.90, 0.94) | <0.001  | 0.96 (0.93, 0.98) | 0.001   | 0.98 (0.95, 1.01) | 0.144   |
| Quintile 1               | 293/11214  | 1.00 (Reference)  |         | 1.00 (Reference)  |         | 1.00 (Reference)  |         |
| Quintile 2               | 417/11213  | 0.84 (0.63, 1.11) |         | 0.86 (0.65, 1.15) |         | 0.86 (0.65, 1.15) |         |
| Quintile 3               | 495/11213  | 0.80 (0.60, 1.07) |         | 0.87 (0.63, 1.20) |         | 0.90 (0.66, 1.23) |         |
| Quintile 4               | 495/11213  | 0.68 (0.52, 0.88) |         | 0.81 (0.61, 1.06) |         | 0.90 (0.68, 1.18) |         |
| Quintile 5               | 496/11213  | 0.47 (0.38, 0.59) | <0.001* | 0.62 (0.49, 0.79) | <0.001* | 0.73 (0.57, 0.94) | 0.059*  |
| <b>Breakfast DAC</b>     |            |                   |         |                   |         |                   |         |
| Continuous breakfast DAC | 2196/56066 | 0.90 (0.87, 0.94) | <0.001  | 0.96 (0.92, 1.00) | 0.038   | 0.99 (0.95, 1.03) | 0.593   |
| Quintile 1               | 203/11214  | 1.00 (Reference)  |         | 1.00 (Reference)  |         | 1.00 (Reference)  |         |
| Quintile 2               | 365/11213  | 1.02 (0.75, 1.40) |         | 0.94 (0.66, 1.34) |         | 0.93 (0.66, 1.32) |         |
| Quintile 3               | 533/11213  | 0.90 (0.70, 1.15) |         | 0.83 (0.63, 1.08) |         | 0.82 (0.63, 1.07) |         |
| Quintile 4               | 495/11213  | 0.84 (0.64, 1.10) |         | 0.88 (0.66, 1.17) |         | 0.91 (0.68, 1.22) |         |
| Quintile 5               | 600/11213  | 0.71 (0.56, 0.89) | <0.001* | 0.82 (0.64, 1.05) | 0.079*  | 0.93 (0.72, 1.20) | 0.740*  |
| <b>Lunch DAC</b>         |            |                   |         |                   |         |                   |         |
| Continuous lunch DAC     | 2196/56066 | 0.95 (0.91, 0.99) | 0.008   | 0.99 (0.96, 1.03) | 0.71    | 1.00 (0.96, 1.04) | 0.972   |
| Quintile 1               | 270/11214  | 1.00 (Reference)  |         | 1.00 (Reference)  |         | 1.00 (Reference)  |         |
| Quintile 2               | 458/11213  | 1.31 (0.99, 1.74) |         | 1.15 (0.87, 1.51) |         | 1.08 (0.82, 1.41) |         |
| Quintile 3               | 523/11213  | 1.35 (1.03, 1.78) |         | 1.32 (1.01, 1.73) |         | 1.28 (0.98, 1.66) |         |
| Quintile 4               | 505/11213  | 1.13 (0.87, 1.47) |         | 1.17 (0.90, 1.53) |         | 1.13 (0.88, 1.45) |         |
| Quintile 5               | 440/11213  | 0.88 (0.67, 1.15) | 0.016*  | 1.05 (0.81, 1.38) | 0.962*  | 1.07 (0.82, 1.40) | 0.660*  |

| Exposure              | Case/N     | Model 1           |         | Model 2           |         | Model 3           |         |
|-----------------------|------------|-------------------|---------|-------------------|---------|-------------------|---------|
|                       |            | HR (95% CI)       | P value | HR (95% CI)       | P value | HR (95% CI)       | P value |
| <b>(continued)</b>    |            |                   |         |                   |         |                   |         |
| <b>Dinner DAC</b>     |            |                   |         |                   |         |                   |         |
| Continuous dinner DAC | 2196/56066 | 0.88 (0.84, 0.93) | <0.001  | 0.93 (0.88, 0.98) | 0.003   | 0.95 (0.90, 1.00) | 0.039   |
| Quintile 1            | 363/11214  | 1.00 (Reference)  |         | 1.00 (Reference)  |         | 1.00 (Reference)  |         |
| Quintile 2            | 550/11213  | 0.95 (0.77, 1.18) |         | 0.87 (0.70, 1.09) |         | 0.83 (0.66, 1.03) |         |
| Quintile 3            | 475/11213  | 0.92 (0.73, 1.16) |         | 0.92 (0.72, 1.17) |         | 0.87 (0.68, 1.11) |         |
| Quintile 4            | 397/11213  | 0.84 (0.66, 1.05) |         | 0.88 (0.69, 1.12) |         | 0.86 (0.68, 1.09) |         |
| Quintile 5            | 411/11213  | 0.66 (0.52, 0.84) | <0.001* | 0.76 (0.60, 0.96) | 0.029*  | 0.78 (0.61, 1.00) | 0.118*  |
| <b>Δ DAC</b>          |            |                   |         |                   |         |                   |         |
| Continuous Δ DAC      | 2196/56066 | 1.00 (0.98, 1.02) | 0.899   | 0.99 (0.97, 1.02) | 0.548   | 0.98 (0.96, 1.01) | 0.221   |
| Quintile 1            | 554/11214  | 1.00 (Reference)  |         | 1.00 (Reference)  |         | 1.00 (Reference)  |         |
| Quintile 2            | 527/11213  | 1.32 (1.09, 1.59) |         | 1.15 (0.94, 1.39) |         | 1.06 (0.88, 1.28) |         |
| Quintile 3            | 444/11213  | 1.34 (1.11, 1.62) |         | 1.12 (0.92, 1.37) |         | 1.00 (0.82, 1.23) |         |
| Quintile 4            | 325/11213  | 1.02 (0.82, 1.26) |         | 0.91 (0.74, 1.13) |         | 0.84 (0.68, 1.04) |         |
| Quintile 5            | 346/11213  | 1.02 (0.84, 1.23) | 0.558*  | 0.99 (0.82, 1.20) | 0.342*  | 0.96 (0.80, 1.16) | 0.177*  |

Abbreviations: HRs, hazard ratio; CIs, confidence intervals; DAC, dietary total antioxidant capacity; HEI-2015, Healthy Eating Index 2015; BMI, body mass index; CVD, cardiovascular disease.

\* P for trend across the quintile of DAC. HR (95%CI) was estimated by weighted Cox regression analyses. Δ equals dinner DAC minus breakfast DAC.

Model 1 adjusted for, age, sex, and race.

Model 2 further adjusted for education, family income, dietary energy intake, alcohol consumption per day, smoking status, physical activity, and BMI.

Model 3 further adjusted for diabetes, hypertension, CVD, cancer, hyperlipidaemia, adherence to HEI-2015 score, and dietary supplement use.

Models for breakfast DAC, lunch DAC, and dinner DAC were further adjusted except for the one that defined the group.

**Supplementary Table 9 Associations of cancer mortality with quintiles of total, breakfast, lunch, dinner, and  $\Delta$  DAC**

| Exposure                 | Case/N     | Model 1           |         | Model 2           |         | Model 3           |         |
|--------------------------|------------|-------------------|---------|-------------------|---------|-------------------|---------|
|                          |            | HR (95% CI)       | P value | HR (95% CI)       | P value | HR (95% CI)       | P value |
| <b>Total DAC</b>         |            |                   |         |                   |         |                   |         |
| Continuous total DAC     | 1984/56066 | 0.95 (0.92, 0.98) | 0.001   | 0.97 (0.94, 1.00) | 0.082   | 0.98 (0.94, 1.02) | 0.256   |
| Quintile 1               | 315/11214  | 1.00 (Reference)  |         | 1.00 (Reference)  |         | 1.00 (Reference)  |         |
| Quintile 2               | 401/11213  | 0.97 (0.73, 1.29) |         | 1.00 (0.75, 1.34) |         | 1.04 (0.77, 1.39) |         |
| Quintile 3               | 425/11213  | 0.86 (0.66, 1.12) |         | 0.93 (0.71, 1.22) |         | 0.94 (0.71, 1.25) |         |
| Quintile 4               | 435/11213  | 0.69 (0.55, 0.85) |         | 0.78 (0.62, 0.98) |         | 0.81 (0.62, 1.05) |         |
| Quintile 5               | 408/11213  | 0.61 (0.48, 0.78) | <0.001* | 0.72 (0.56, 0.94) | 0.001*  | 0.76 (0.56, 1.03) | 0.019*  |
| <b>Breakfast DAC</b>     |            |                   |         |                   |         |                   |         |
| Continuous breakfast DAC | 1984/56066 | 0.93 (0.88, 0.98) | 0.012   | 0.97 (0.91, 1.02) | 0.225   | 0.98 (0.92, 1.04) | 0.453   |
| Quintile 1               | 250/11214  | 1.00 (Reference)  |         | 1.00 (Reference)  |         | 1.00 (Reference)  |         |
| Quintile 2               | 375/11213  | 1.11 (0.84, 1.48) |         | 1.02 (0.76, 1.37) |         | 1.02 (0.77, 1.37) |         |
| Quintile 3               | 430/11213  | 0.84 (0.65, 1.09) |         | 0.80 (0.60, 1.06) |         | 0.81 (0.61, 1.07) |         |
| Quintile 4               | 444/11213  | 0.92 (0.72, 1.17) |         | 0.96 (0.75, 1.24) |         | 1.00 (0.77, 1.29) |         |
| Quintile 5               | 485/11213  | 0.76 (0.57, 1.02) | 0.005*  | 0.85 (0.63, 1.15) | 0.217*  | 0.90 (0.65, 1.24) | 0.501*  |
| <b>Lunch DAC</b>         |            |                   |         |                   |         |                   |         |
| Continuous lunch DAC     | 1984/56066 | 0.96 (0.92, 1.01) | 0.096   | 0.98 (0.94, 1.03) | 0.484   | 0.99 (0.95, 1.04) | 0.667   |
| Quintile 1               | 326/11214  | 1.00 (Reference)  |         | 1.00 (Reference)  |         | 1.00 (Reference)  |         |
| Quintile 2               | 389/11213  | 1.19 (0.94, 1.51) |         | 1.06 (0.84, 1.35) |         | 1.03 (0.81, 1.31) |         |
| Quintile 3               | 412/11213  | 1.04 (0.82, 1.33) |         | 0.96 (0.75, 1.23) |         | 0.92 (0.72, 1.19) |         |
| Quintile 4               | 451/11213  | 1.07 (0.81, 1.40) |         | 1.03 (0.78, 1.37) |         | 1.03 (0.78, 1.35) |         |
| Quintile 5               | 406/11213  | 0.98 (0.75, 1.27) | 0.449*  | 1.03 (0.78, 1.36) | 0.909*  | 1.07 (0.79, 1.43) | 0.671*  |

| Exposure               | Case/N     | Model 1           |         | Model 2           |         | Model 3           |         |
|------------------------|------------|-------------------|---------|-------------------|---------|-------------------|---------|
|                        |            | HR (95% CI)       | P value | HR (95% CI)       | P value | HR (95% CI)       | P value |
| <b>(continued)</b>     |            |                   |         |                   |         |                   |         |
| <b>Dinner DAC</b>      |            |                   |         |                   |         |                   |         |
| Continuous dinner DAC  | 1984/56066 | 0.96 (0.90, 1.03) | 0.233   | 0.99 (0.93, 1.06) | 0.854   | 1.00 (0.93, 1.07) | 0.996   |
| Quintile 1             | 384/11214  | 1.00 (Reference)  |         | 1.00 (Reference)  |         | 1.00 (Reference)  |         |
| Quintile 2             | 484/11213  | 1.12 (0.89, 1.40) |         | 1.03 (0.82, 1.31) |         | 1.00 (0.79, 1.27) |         |
| Quintile 3             | 384/11213  | 0.84 (0.67, 1.06) |         | 0.84 (0.66, 1.07) |         | 0.80 (0.63, 1.02) |         |
| Quintile 4             | 354/11213  | 0.87 (0.65, 1.15) |         | 0.91 (0.69, 1.19) |         | 0.86 (0.67, 1.12) |         |
| Quintile 5             | 378/11213  | 0.80 (0.61, 1.06) | 0.023*  | 0.88 (0.67, 1.17) | 0.225*  | 0.87 (0.66, 1.15) | 0.171*  |
| <b>Δ DAC value</b>     |            |                   |         |                   |         |                   |         |
| Continuous Δ DAC value | 1984/56066 | 1.02 (0.98, 1.06) | 0.385   | 1.02 (0.97, 1.06) | 0.519   | 1.01 (0.97, 1.06) | 0.561   |
| Quintile 1             | 476/11214  | 1.00 (Reference)  |         | 1.00 (Reference)  |         | 1.00 (Reference)  |         |
| Quintile 2             | 442/11213  | 1.03 (0.83, 1.27) |         | 0.93 (0.75, 1.14) |         | 0.90 (0.73, 1.13) |         |
| Quintile 3             | 403/11213  | 1.21 (0.97, 1.52) |         | 1.03 (0.82, 1.28) |         | 0.98 (0.75, 1.27) |         |
| Quintile 4             | 337/11213  | 1.08 (0.87, 1.34) |         | 0.99 (0.80, 1.24) |         | 0.96 (0.76, 1.22) |         |
| Quintile 5             | 326/11213  | 0.92 (0.70, 1.21) | 0.794*  | 0.90 (0.69, 1.19) | 0.673*  | 0.90 (0.68, 1.20) | 0.632*  |

Abbreviations: HRs, hazard ratio; CIs, confidence intervals; DAC, dietary total antioxidant capacity; HEI-2015, Healthy Eating Index 2015; BMI, body mass index; CVD, cardiovascular disease.

\* P for trend across the quintile of DAC. HR (95%CI) was estimated by weighted Cox regression analyses. Δ equals dinner DAC minus breakfast DAC.

Model 1 adjusted for, age, sex, and race.

Model 2 further adjusted for education, family income, dietary energy intake, alcohol consumption per day, smoking status, physical activity, and BMI.

Model 3 further adjusted for diabetes, hypertension, CVD, cancer, hyperlipidaemia, adherence to HEI-2015 score, and dietary supplement use.

Models for breakfast DAC, lunch DAC, and dinner DAC were further adjusted except for the one that defined the group.

**Supplementary Table 10 Association of total DAC and all-cause mortality by ten characteristics**

| Characteristics                        | Case/N     | Total DAC        |                   |                   |                   |                   | P for interaction |
|----------------------------------------|------------|------------------|-------------------|-------------------|-------------------|-------------------|-------------------|
|                                        |            | Quintile 1       | Quintile 2        | Quintile 3        | Quintile 4        | Quintile 5        |                   |
| <b>Age (years)</b>                     |            |                  |                   |                   |                   |                   | 0.133             |
| age<65                                 | 2671/43027 | 1.00 (Reference) | 0.99 (0.78, 1.26) | 1.10 (0.86, 1.40) | 1.01 (0.78, 1.29) | 1.02 (0.78, 1.33) |                   |
| age≥65                                 | 5895/13039 | 1.00 (Reference) | 0.85 (0.73, 0.99) | 0.94 (0.80, 1.10) | 0.90 (0.75, 1.08) | 0.74 (0.61, 0.89) |                   |
| <b>Sex</b>                             |            |                  |                   |                   |                   |                   | 0.152             |
| Men                                    | 4832/28133 | 1.00 (Reference) | 0.88 (0.73, 1.06) | 0.91 (0.74, 1.12) | 0.80 (0.67, 0.96) | 0.64 (0.52, 0.80) |                   |
| Women                                  | 3734/27933 | 1.00 (Reference) | 0.80 (0.64, 0.98) | 0.82 (0.67, 1.01) | 0.75 (0.60, 0.93) | 0.77 (0.59, 0.99) |                   |
| <b>Race/ethnicity</b>                  |            |                  |                   |                   |                   |                   | 0.935             |
| Mexican American                       | 1074/9314  | 1.00 (Reference) | 1.00 (0.67, 1.49) | 1.15 (0.82, 1.60) | 0.94 (0.59, 1.48) | 1.31 (0.70, 2.44) |                   |
| Non-Hispanic Black                     | 1630/11411 | 1.00 (Reference) | 0.91 (0.72, 1.15) | 1.07 (0.81, 1.41) | 0.96 (0.73, 1.27) | 0.82 (0.53, 1.27) |                   |
| Non-Hispanic White                     | 5261/26797 | 1.00 (Reference) | 0.82 (0.68, 0.98) | 0.82 (0.68, 0.98) | 0.72 (0.60, 0.85) | 0.61 (0.51, 0.73) |                   |
| Other Hispanic                         | 334/4149   | 1.00 (Reference) | 1.00 (0.53, 1.87) | 0.98 (0.50, 1.92) | 1.43 (0.54, 3.82) | 1.38 (0.53, 3.58) |                   |
| Other                                  | 267/4395   | 1.00 (Reference) | 0.75 (0.35, 1.59) | 0.73 (0.37, 1.44) | 0.68 (0.29, 1.62) | 0.85 (0.31, 2.32) |                   |
| <b>Education</b>                       |            |                  |                   |                   |                   |                   | 0.353             |
| less than 9th grade                    | 1611/5784  | 1.00 (Reference) | 0.77 (0.58, 1.02) | 0.85 (0.63, 1.16) | 0.76 (0.56, 1.03) | 0.88 (0.55, 1.41) |                   |
| 9-11th grade                           | 1548/7577  | 1.00 (Reference) | 0.75 (0.58, 0.97) | 0.60 (0.47, 0.77) | 0.69 (0.53, 0.90) | 0.70 (0.52, 0.95) |                   |
| College graduate or above              | 1278/13386 | 1.00 (Reference) | 0.70 (0.47, 1.06) | 0.83 (0.55, 1.25) | 0.62 (0.42, 0.91) | 0.62 (0.40, 0.94) |                   |
| High school graduate/GED or equivalent | 2099/12686 | 1.00 (Reference) | 0.96 (0.70, 1.30) | 1.13 (0.81, 1.58) | 0.94 (0.68, 1.30) | 0.79 (0.55, 1.14) |                   |
| Some college or AA degree              | 2006/16575 | 1.00 (Reference) | 0.87 (0.67, 1.14) | 0.89 (0.69, 1.15) | 0.82 (0.62, 1.09) | 0.65 (0.47, 0.90) |                   |
| <b>Income</b>                          |            |                  |                   |                   |                   |                   | 0.615             |
| \$ 0 to \$ 19,999                      | 3093/12829 | 1.00 (Reference) | 0.79 (0.66, 0.96) | 0.90 (0.73, 1.12) | 0.84 (0.67, 1.04) | 0.75 (0.55, 1.02) |                   |
| \$20,000 to \$44,999                   | 3356/18656 | 1.00 (Reference) | 0.82 (0.67, 1.01) | 0.83 (0.67, 1.02) | 0.72 (0.56, 0.91) | 0.59 (0.45, 0.77) |                   |

| Characteristics                           | Case/N     | Total DAC        |                   |                   |                   |                   | P for interaction |
|-------------------------------------------|------------|------------------|-------------------|-------------------|-------------------|-------------------|-------------------|
|                                           |            | Quintile 1       | Quintile 2        | Quintile 3        | Quintile 4        | Quintile 5        |                   |
| <b>(continued)</b>                        |            |                  |                   |                   |                   |                   |                   |
| \$45,000 to \$74,999                      | 1206/10832 | 1.00 (Reference) | 0.86 (0.56, 1.33) | 0.95 (0.65, 1.40) | 0.89 (0.63, 1.27) | 0.84 (0.58, 1.22) |                   |
| \$75,000 to \$99,999                      | 746/9026   | 1.00 (Reference) | 0.92 (0.53, 1.60) | 0.62 (0.39, 0.98) | 0.57 (0.36, 0.92) | 0.61 (0.35, 1.09) |                   |
| \$100,000 and Over                        | 165/4723   | 1.00 (Reference) | 1.23 (0.48, 3.15) | 1.59 (0.60, 4.22) | 1.49 (0.56, 3.93) | 1.00 (0.28, 3.49) |                   |
| <b>Body mass index (kg/m<sup>2</sup>)</b> |            |                  |                   |                   |                   |                   | 0.331             |
| >25                                       | 2570/17134 | 1.00 (Reference) | 0.75 (0.60, 0.94) | 0.79 (0.63, 0.99) | 0.74 (0.58, 0.96) | 0.56 (0.41, 0.76) |                   |
| 25 to 29                                  | 3065/19093 | 1.00 (Reference) | 0.86 (0.69, 1.07) | 0.91 (0.70, 1.18) | 0.68 (0.53, 0.86) | 0.70 (0.52, 0.96) |                   |
| ≥30                                       | 2931/19839 | 1.00 (Reference) | 0.90 (0.70, 1.18) | 0.89 (0.72, 1.10) | 0.94 (0.73, 1.21) | 0.81 (0.59, 1.10) |                   |
| <b>Smoking status</b>                     |            |                  |                   |                   |                   |                   | <0.001*           |
| Never smoked                              | 3443/30509 | 1.00 (Reference) | 0.84 (0.63, 1.11) | 0.88 (0.67, 1.15) | 0.83 (0.63, 1.10) | 0.79 (0.58, 1.06) |                   |
| Past smoker                               | 3438/14074 | 1.00 (Reference) | 0.83 (0.67, 1.01) | 0.85 (0.69, 1.04) | 0.76 (0.60, 0.97) | 0.69 (0.53, 0.89) |                   |
| Current smoker                            | 1685/11483 | 1.00 (Reference) | 0.94 (0.74, 1.19) | 0.98 (0.76, 1.27) | 0.84 (0.65, 1.07) | 0.63 (0.47, 0.84) |                   |
| <b>Drinking (g/day)</b>                   |            |                  |                   |                   |                   |                   | 0.435             |
| Tertile 1                                 | 4484/18689 | 1.00 (Reference) | 0.83 (0.67, 1.03) | 0.81 (0.67, 0.98) | 0.73 (0.60, 0.88) | 0.64 (0.50, 0.83) |                   |
| Tertile 2                                 | 2005/18689 | 1.00 (Reference) | 0.91 (0.73, 1.13) | 0.94 (0.76, 1.18) | 0.98 (0.80, 1.21) | 0.78 (0.58, 1.05) |                   |
| Tertile 3                                 | 2077/18688 | 1.00 (Reference) | 0.75 (0.53, 1.06) | 0.88 (0.65, 1.19) | 0.71 (0.50, 1.01) | 0.75 (0.56, 1.01) |                   |
| <b>HEI-2015 score</b>                     |            |                  |                   |                   |                   |                   | 0.255             |
| <70                                       | 7662/51043 | 1.00 (Reference) | 0.84 (0.72, 0.98) | 0.86 (0.74, 0.99) | 0.77 (0.67, 0.89) | 0.66 (0.56, 0.78) |                   |
| ≥70                                       | 904/5023   | 1.00 (Reference) | 0.95 (0.26, 3.46) | 1.20 (0.38, 3.77) | 1.01 (0.32, 3.22) | 0.94 (0.29, 3.01) |                   |
| <b>Physical activity (METs-h/week)</b>    |            |                  |                   |                   |                   |                   | 0.351             |
| <5                                        | 2762/17438 | 1.00 (Reference) | 0.71 (0.55, 0.93) | 0.77 (0.63, 0.94) | 0.67 (0.53, 0.85) | 0.65 (0.51, 0.82) |                   |
| 5 to 11                                   | 1316/13694 | 1.00 (Reference) | 0.72 (0.52, 0.99) | 1.02 (0.69, 1.51) | 0.74 (0.52, 1.07) | 0.59 (0.39, 0.88) |                   |
| ≥12                                       | 4488/24934 | 1.00 (Reference) | 0.94 (0.81, 1.08) | 0.86 (0.74, 1.00) | 0.84 (0.72, 1.00) | 0.74 (0.60, 0.92) |                   |

Abbreviations: HRs, hazard ratio; CIs, confidence intervals; DAC, dietary total antioxidant capacity; HEI-2015, Healthy Eating Index 2015; BMI, body mass index; CVD, cardiovascular disease. HR (95%CI) was estimated by weighted Cox regression analyses. Model was adjusted for, age, sex, race, education, family income, dietary energy intake, alcohol consumption per day, smoking status, physical activity, BMI, diabetes, hypertension, CVD, cancer, hyperlipidaemia, adherence to HEI-2015 score, and dietary supplement use except for the one that defined the group.

**Supplementary Table 11 Association of dinner DAC and all-cause mortality by ten characteristics**

| Characteristics                        | Case/N     | Dinner DAC       |                   |                   |                   |                   | P for interaction |
|----------------------------------------|------------|------------------|-------------------|-------------------|-------------------|-------------------|-------------------|
|                                        |            | Quintile 1       | Quintile 2        | Quintile 3        | Quintile 4        | Quintile 5        |                   |
| <b>Age (years)</b>                     |            |                  |                   |                   |                   |                   | <0.001*           |
| age<65                                 | 2671/43027 | 1.00 (Reference) | 0.93 (0.78, 1.12) | 0.79 (0.63, 1.00) | 0.84 (0.65, 1.08) | 0.68 (0.46, 1.00) |                   |
| age≥65                                 | 5895/13039 | 1.00 (Reference) | 0.99 (0.86, 1.13) | 0.94 (0.81, 1.08) | 0.92 (0.78, 1.08) | 0.89 (0.71, 1.11) |                   |
| <b>Sex</b>                             |            |                  |                   |                   |                   |                   | 0.837             |
| Men                                    | 4832/28133 | 1.00 (Reference) | 0.97 (0.82, 1.15) | 0.88 (0.74, 1.05) | 0.85 (0.71, 1.02) | 0.81 (0.63, 1.05) |                   |
| Women                                  | 3734/27933 | 1.00 (Reference) | 0.90 (0.73, 1.10) | 0.91 (0.75, 1.11) | 0.91 (0.71, 1.16) | 0.85 (0.63, 1.14) |                   |
| <b>Race/ethnicity</b>                  |            |                  |                   |                   |                   |                   | 0.831             |
| Mexican American                       | 1074/9314  | 1.00 (Reference) | 1.30 (0.93, 1.80) | 1.30 (0.85, 1.97) | 1.13 (0.79, 1.61) | 0.99 (0.55, 1.76) |                   |
| Non-Hispanic Black                     | 1630/11411 | 1.00 (Reference) | 0.98 (0.74, 1.30) | 1.15 (0.89, 1.49) | 1.04 (0.78, 1.38) | 1.01 (0.72, 1.42) |                   |
| Non-Hispanic White                     | 5261/26797 | 1.00 (Reference) | 0.91 (0.78, 1.06) | 0.83 (0.73, 0.94) | 0.84 (0.70, 1.01) | 0.78 (0.60, 1.00) |                   |
| Other Hispanic                         | 334/4149   | 1.00 (Reference) | 1.46 (0.92, 2.32) | 2.74 (1.12, 6.69) | 1.35 (0.80, 2.26) | 2.32 (1.06, 5.08) |                   |
| Other                                  | 267/4395   | 1.00 (Reference) | 0.87 (0.47, 1.62) | 0.71 (0.34, 1.49) | 0.74 (0.34, 1.64) | 0.77 (0.26, 2.25) |                   |
| <b>Education</b>                       |            |                  |                   |                   |                   |                   | 0.312             |
| less than 9th grade                    | 1611/5784  | 1.00 (Reference) | 1.21 (0.90, 1.63) | 1.32 (0.94, 1.84) | 1.23 (0.88, 1.71) | 1.03 (0.61, 1.73) |                   |
| 9-11th grade                           | 1548/7577  | 1.00 (Reference) | 0.99 (0.76, 1.29) | 0.73 (0.55, 0.97) | 0.65 (0.47, 0.89) | 0.52 (0.35, 0.78) |                   |
| College graduate or above              | 1278/13386 | 1.00 (Reference) | 0.96 (0.66, 1.39) | 0.93 (0.62, 1.39) | 0.95 (0.64, 1.42) | 0.88 (0.55, 1.40) |                   |
| High school graduate/GED or equivalent | 2099/12686 | 1.00 (Reference) | 0.94 (0.72, 1.21) | 0.82 (0.65, 1.03) | 0.85 (0.63, 1.15) | 0.68 (0.43, 1.08) |                   |
| Some college or AA degree              | 2006/16575 | 1.00 (Reference) | 0.83 (0.62, 1.11) | 0.98 (0.74, 1.31) | 0.92 (0.67, 1.24) | 1.09 (0.71, 1.68) |                   |
| <b>Income</b>                          |            |                  |                   |                   |                   |                   | 0.993             |
| \$ 0 to \$ 19,999                      | 3093/12829 | 1.00 (Reference) | 1.07 (0.88, 1.30) | 0.95 (0.80, 1.13) | 0.97 (0.78, 1.20) | 1.17 (0.82, 1.65) |                   |
| \$20,000 to \$44,999                   | 3356/18656 | 1.00 (Reference) | 0.88 (0.75, 1.04) | 0.91 (0.76, 1.08) | 0.77 (0.64, 0.94) | 0.69 (0.53, 0.91) |                   |

| Characteristics                           | Case/N     | Dinner DAC       |                   |                   |                   |                   | P for interaction |
|-------------------------------------------|------------|------------------|-------------------|-------------------|-------------------|-------------------|-------------------|
|                                           |            | Quintile 1       | Quintile 2        | Quintile 3        | Quintile 4        | Quintile 5        |                   |
| <b>(continued)</b>                        |            |                  |                   |                   |                   |                   |                   |
| \$45,000 to \$74,999                      | 1206/10832 | 1.00 (Reference) | 1.04 (0.81, 1.34) | 1.03 (0.74, 1.43) | 1.12 (0.81, 1.56) | 0.79 (0.54, 1.15) |                   |
| \$75,000 to \$99,999                      | 746/9026   | 1.00 (Reference) | 0.77 (0.49, 1.21) | 0.67 (0.41, 1.11) | 0.78 (0.46, 1.33) | 0.77 (0.39, 1.52) |                   |
| \$100,000 and Over                        | 165/4723   | 1.00 (Reference) | 1.08 (0.48, 2.42) | 0.91 (0.46, 1.80) | 1.62 (0.85, 3.10) | 1.40 (0.62, 3.17) |                   |
| <b>Body mass index (kg/m<sup>2</sup>)</b> |            |                  |                   |                   |                   |                   | 0.506             |
| >25                                       | 2570/17134 | 1.00 (Reference) | 1.08 (0.85, 1.36) | 1.00 (0.80, 1.25) | 1.04 (0.80, 1.37) | 0.94 (0.68, 1.29) |                   |
| 25 to 29                                  | 3065/19093 | 1.00 (Reference) | 0.99 (0.80, 1.22) | 0.91 (0.75, 1.11) | 0.91 (0.71, 1.16) | 0.83 (0.57, 1.22) |                   |
| ≥30                                       | 2931/19839 | 1.00 (Reference) | 0.80 (0.66, 0.96) | 0.81 (0.64, 1.03) | 0.76 (0.59, 0.99) | 0.72 (0.52, 0.99) |                   |
| <b>Smoking status</b>                     |            |                  |                   |                   |                   |                   | 0.027*            |
| Never smoked                              | 3443/30509 | 1.00 (Reference) | 0.92 (0.75, 1.14) | 0.87 (0.69, 1.09) | 0.95 (0.75, 1.21) | 0.85 (0.63, 1.16) |                   |
| Past smoker                               | 3438/14074 | 1.00 (Reference) | 0.92 (0.75, 1.12) | 0.94 (0.77, 1.16) | 0.80 (0.64, 1.00) | 0.77 (0.57, 1.05) |                   |
| Current smoker                            | 1685/11483 | 1.00 (Reference) | 1.00 (0.79, 1.28) | 0.89 (0.68, 1.17) | 0.92 (0.68, 1.23) | 0.76 (0.43, 1.37) |                   |
| <b>Drinking (g/day)</b>                   |            |                  |                   |                   |                   |                   | 0.265             |
| Tertile 1                                 | 4484/18689 | 1.00 (Reference) | 0.96 (0.82, 1.13) | 0.97 (0.82, 1.13) | 0.89 (0.74, 1.07) | 0.80 (0.62, 1.04) |                   |
| Tertile 2                                 | 2005/18689 | 1.00 (Reference) | 1.05 (0.84, 1.32) | 1.02 (0.84, 1.23) | 1.03 (0.81, 1.31) | 1.01 (0.70, 1.46) |                   |
| Tertile 3                                 | 2077/18688 | 1.00 (Reference) | 0.84 (0.65, 1.07) | 0.70 (0.54, 0.91) | 0.77 (0.58, 1.03) | 0.72 (0.49, 1.06) |                   |
| <b>HEI-2015 score</b>                     |            |                  |                   |                   |                   |                   | 0.087             |
| <70                                       | 7662/51043 | 1.00 (Reference) | 0.95 (0.84, 1.09) | 0.93 (0.83, 1.04) | 0.87 (0.75, 1.02) | 0.81 (0.64, 1.03) |                   |
| ≥70                                       | 904/5023   | 1.00 (Reference) | 0.94 (0.62, 1.40) | 0.74 (0.44, 1.24) | 1.08 (0.70, 1.66) | 0.88 (0.56, 1.37) |                   |
| <b>Physical activity (METs-h/week)</b>    |            |                  |                   |                   |                   |                   | 0.911             |
| <5                                        | 2762/17438 | 1.00 (Reference) | 0.77 (0.64, 0.93) | 0.79 (0.65, 0.95) | 0.75 (0.60, 0.94) | 0.68 (0.51, 0.90) |                   |
| 5 to 11                                   | 1316/13694 | 1.00 (Reference) | 0.89 (0.67, 1.19) | 0.98 (0.74, 1.30) | 1.02 (0.73, 1.42) | 0.98 (0.61, 1.58) |                   |
| ≥12                                       | 4488/24934 | 1.00 (Reference) | 1.05 (0.90, 1.23) | 0.94 (0.82, 1.08) | 0.93 (0.79, 1.09) | 0.92 (0.73, 1.17) |                   |

Abbreviations: HRs, hazard ratio; CIs, confidence intervals; DAC, dietary total antioxidant capacity; HEI-2015, Healthy Eating Index 2015; BMI, body mass index; CVD, cardiovascular disease. HR (95%CI) was estimated by weighted Cox regression analyses. Model was adjusted for, age, sex, race, education, family income, dietary energy intake, alcohol consumption per day, smoking status, physical activity, BMI, diabetes, hypertension, CVD, cancer, hyperlipidaemia, adherence to HEI-2015 score, and dietary supplement use except for the one that defined the group.

**Supplementary Table 12 Associations of  $\Delta$  DAC and all-cause mortality by ten characteristics**

| Characteristics                        | Case/N     | $\Delta$ DAC     |                   |                   |                    |                    | P for interaction |
|----------------------------------------|------------|------------------|-------------------|-------------------|--------------------|--------------------|-------------------|
|                                        |            | Quintile 1       | Quintile 2        | Quintile 3        | Quintile 4         | Quintile 5         |                   |
| <b>Age (years)</b>                     |            |                  |                   |                   |                    |                    | 0.055             |
| age<65                                 | 2671/43027 | 1.00 (Reference) | 1.04 (0.75, 1.43) | 0.90 (0.63, 1.29) | 0.75 (0.53, 1.06)  | 0.61 (0.39, 0.95)  |                   |
| age $\geq$ 65                          | 5895/13039 | 1.00 (Reference) | 0.87 (0.77, 0.99) | 0.93 (0.80, 1.09) | 0.82 (0.69, 0.97)  | 0.78 (0.65, 0.94)  |                   |
| <b>Sex</b>                             |            |                  |                   |                   |                    |                    | 0.491             |
| Men                                    | 4832/28133 | 1.00 (Reference) | 0.89 (0.73, 1.09) | 0.95 (0.75, 1.19) | 0.81 (0.63, 1.03)  | 0.71 (0.54, 0.94)  |                   |
| Women                                  | 3734/27933 | 1.00 (Reference) | 1.01 (0.84, 1.21) | 1.00 (0.81, 1.24) | 0.93 (0.77, 1.13)  | 0.91 (0.69, 1.20)  |                   |
| <b>Race/ethnicity</b>                  |            |                  |                   |                   |                    |                    | 0.967             |
| Mexican American                       | 1074/9314  | 1.00 (Reference) | 1.02 (0.68, 1.54) | 1.37 (0.88, 2.12) | 1.08 (0.64, 1.82)  | 0.83 (0.48, 1.44)  |                   |
| Non-Hispanic Black                     | 1630/11411 | 1.00 (Reference) | 1.21 (0.93, 1.57) | 1.36 (0.97, 1.92) | 1.50 (1.08, 2.07)  | 1.53 (0.94, 2.49)  |                   |
| Non-Hispanic White                     | 5261/26797 | 1.00 (Reference) | 0.86 (0.73, 1.01) | 0.85 (0.71, 1.01) | 0.72 (0.61, 0.85)  | 0.64 (0.50, 0.82)  |                   |
| Other Hispanic                         | 334/4149   | 1.00 (Reference) | 2.39 (1.32, 4.31) | 2.69 (1.13, 6.41) | 3.77 (1.33, 10.63) | 5.37 (1.84, 15.67) |                   |
| Other                                  | 267/4395   | 1.00 (Reference) | 0.95 (0.55, 1.64) | 0.92 (0.41, 2.08) | 0.84 (0.38, 1.83)  | 0.75 (0.32, 1.73)  |                   |
| <b>Education</b>                       |            |                  |                   |                   |                    |                    | 0.187             |
| less than 9th grade                    | 1611/5784  | 1.00 (Reference) | 0.90 (0.66, 1.22) | 1.12 (0.86, 1.45) | 1.32 (0.93, 1.86)  | 0.77 (0.50, 1.18)  |                   |
| 9-11th grade                           | 1548/7577  | 1.00 (Reference) | 0.88 (0.68, 1.13) | 0.92 (0.70, 1.22) | 0.73 (0.54, 0.99)  | 0.67 (0.45, 1.01)  |                   |
| College graduate or above              | 1278/13386 | 1.00 (Reference) | 1.02 (0.74, 1.41) | 1.19 (0.84, 1.68) | 1.00 (0.68, 1.48)  | 0.80 (0.50, 1.28)  |                   |
| High school graduate/GED or equivalent | 2099/12686 | 1.00 (Reference) | 0.82 (0.61, 1.11) | 0.76 (0.55, 1.05) | 0.69 (0.49, 0.98)  | 0.65 (0.39, 1.09)  |                   |
| Some college or AA degree              | 2006/16575 | 1.00 (Reference) | 0.99 (0.75, 1.33) | 0.96 (0.70, 1.33) | 0.77 (0.54, 1.09)  | 0.90 (0.58, 1.41)  |                   |
| <b>Income</b>                          |            |                  |                   |                   |                    |                    | 0.047*            |
| \$ 0 to \$ 19,999                      | 3093/12829 | 1.00 (Reference) | 0.98 (0.81, 1.18) | 1.09 (0.87, 1.37) | 1.09 (0.90, 1.33)  | 1.03 (0.76, 1.39)  |                   |
| \$20,000 to \$44,999                   | 3356/18656 | 1.00 (Reference) | 1.00 (0.80, 1.25) | 0.97 (0.80, 1.17) | 0.82 (0.65, 1.04)  | 0.76 (0.56, 1.05)  |                   |

| Characteristics                           | Case/N     | $\Delta$ DAC     |                   |                   |                   |                   | P for interaction |
|-------------------------------------------|------------|------------------|-------------------|-------------------|-------------------|-------------------|-------------------|
|                                           |            | Quintile 1       | Quintile 2        | Quintile 3        | Quintile 4        | Quintile 5        |                   |
| <b>(continued)</b>                        |            |                  |                   |                   |                   |                   |                   |
| \$45,000 to \$74,999                      | 1206/10832 | 1.00 (Reference) | 0.81 (0.62, 1.06) | 0.79 (0.58, 1.06) | 0.78 (0.56, 1.09) | 0.74 (0.48, 1.16) |                   |
| \$75,000 to \$99,999                      | 746/9026   | 1.00 (Reference) | 0.87 (0.48, 1.57) | 1.06 (0.53, 2.14) | 0.65 (0.31, 1.35) | 0.58 (0.27, 1.27) |                   |
| \$100,000 and Over                        | 165/4723   | 1.00 (Reference) | 1.10 (0.45, 2.67) | 0.95 (0.39, 2.30) | 0.87 (0.38, 2.01) | 0.67 (0.23, 1.95) |                   |
| <b>Body mass index (kg/m<sup>2</sup>)</b> |            |                  |                   |                   |                   |                   | 0.635             |
| >25                                       | 2570/17134 | 1.00 (Reference) | 1.01 (0.80, 1.28) | 1.09 (0.85, 1.39) | 0.96 (0.73, 1.27) | 1.07 (0.77, 1.49) |                   |
| 25 to 29                                  | 3065/19093 | 1.00 (Reference) | 0.82 (0.66, 1.01) | 0.82 (0.64, 1.04) | 0.78 (0.60, 1.00) | 0.53 (0.39, 0.73) |                   |
| ≥30                                       | 2931/19839 | 1.00 (Reference) | 1.01 (0.80, 1.27) | 1.01 (0.81, 1.26) | 0.86 (0.65, 1.13) | 0.88 (0.61, 1.26) |                   |
| <b>Smoking status</b>                     |            |                  |                   |                   |                   |                   | 0.922             |
| Never smoked                              | 3443/30509 | 1.00 (Reference) | 0.86 (0.69, 1.07) | 0.91 (0.72, 1.14) | 0.84 (0.67, 1.06) | 0.71 (0.54, 0.94) |                   |
| Past smoker                               | 3438/14074 | 1.00 (Reference) | 0.98 (0.82, 1.17) | 1.09 (0.90, 1.33) | 0.91 (0.73, 1.13) | 0.88 (0.67, 1.16) |                   |
| Current smoker                            | 1685/11483 | 1.00 (Reference) | 0.79 (0.55, 1.15) | 0.70 (0.48, 1.03) | 0.62 (0.43, 0.90) | 0.59 (0.36, 0.98) |                   |
| <b>Drinking (g/day)</b>                   |            |                  |                   |                   |                   |                   | 0.947             |
| Tertile 1                                 | 4484/18689 | 1.00 (Reference) | 0.92 (0.76, 1.13) | 0.97 (0.80, 1.18) | 0.86 (0.70, 1.06) | 0.73 (0.56, 0.94) |                   |
| Tertile 2                                 | 2005/18689 | 1.00 (Reference) | 0.86 (0.70, 1.06) | 0.91 (0.72, 1.15) | 0.78 (0.62, 0.98) | 0.84 (0.60, 1.18) |                   |
| Tertile 3                                 | 2077/18688 | 1.00 (Reference) | 0.99 (0.71, 1.38) | 0.95 (0.67, 1.34) | 0.83 (0.57, 1.22) | 0.78 (0.48, 1.26) |                   |
| <b>HEI-2015 score</b>                     |            |                  |                   |                   |                   |                   | 0.177             |
| <70                                       | 7662/51043 | 1.00 (Reference) | 0.89 (0.77, 1.04) | 0.92 (0.77, 1.08) | 0.81 (0.69, 0.96) | 0.71 (0.55, 0.91) |                   |
| ≥70                                       | 904/5023   | 1.00 (Reference) | 1.11 (0.79, 1.57) | 1.32 (0.89, 1.96) | 1.00 (0.69, 1.43) | 1.27 (0.81, 1.99) |                   |
| <b>Physical activity (METs-h/week)</b>    |            |                  |                   |                   |                   |                   | 0.296             |
| <5                                        | 2762/17438 | 1.00 (Reference) | 1.00 (0.80, 1.23) | 1.02 (0.81, 1.28) | 0.87 (0.68, 1.10) | 0.79 (0.58, 1.07) |                   |
| 5 to 11                                   | 1316/13694 | 1.00 (Reference) | 1.09 (0.77, 1.53) | 1.22 (0.79, 1.90) | 1.08 (0.72, 1.64) | 0.96 (0.55, 1.69) |                   |
| ≥12                                       | 4488/24934 | 1.00 (Reference) | 0.86 (0.74, 1.01) | 0.89 (0.75, 1.06) | 0.79 (0.66, 0.95) | 0.76 (0.59, 0.98) |                   |

Abbreviations: HRs, hazard ratio; CIs, confidence intervals; DAC, dietary total antioxidant capacity; HEI-2015, Healthy Eating Index 2015; BMI, body mass index; CVD, cardiovascular disease. HR (95%CI) was estimated by weighted Cox regression analyses. Model was adjusted for, age, sex, race, education, family income, dietary energy intake, alcohol consumption per day, smoking status, physical activity, BMI, diabetes, hypertension, CVD, cancer, hyperlipidaemia, adherence to HEI-2015 score, and dietary supplement use except for the one that defined the group.

**Supplementary Table 13 Baseline characteristics of biochemical indicators, categorized by quintiles of total, dinner, and  $\Delta$  DACs**

| <b>Total DAC</b>               | <b>Variable</b>            | <b>Quintile 1</b> | <b>Quintile 2</b> | <b>Quintile 3</b> | <b>Quintile 4</b> | <b>Quintile 5</b> | <b>P value</b> |
|--------------------------------|----------------------------|-------------------|-------------------|-------------------|-------------------|-------------------|----------------|
|                                | Fasting glucose (mmol/L)   | 5.05±0.02         | 5.09±0.02         | 5.09±0.02         | 5.08±0.02         | 5.01±0.02         | 0.010          |
|                                | Glycohemoglobin (%)        | 5.48±0.01         | 5.51±0.01         | 5.56±0.02         | 5.52±0.02         | 5.44±0.02         | <0.001         |
|                                | HOMA-IR                    | 1.49±0.06         | 1.66±0.06         | 1.55±0.06         | 1.41±0.05         | 1.29±0.04         | <0.001         |
|                                | HOMA-IS                    | 2.43±0.04         | 2.25±0.04         | 2.24±0.04         | 2.25±0.05         | 2.26±0.05         | 0.010          |
|                                | Triglyceride-glucose index | 8.62±0.01         | 8.63±0.01         | 8.62±0.01         | 8.60±0.01         | 8.54±0.01         | <0.001         |
|                                | HDL-cholesterol (mg/dL)    | 58.56±0.65        | 58.63±0.61        | 59.69±0.60        | 60.91±0.49        | 63.44±0.59        | <0.001         |
|                                |                            |                   |                   |                   |                   |                   |                |
| <b>Dinner DAC</b>              | <b>Variable</b>            | <b>Quintile 1</b> | <b>Quintile 2</b> | <b>Quintile 3</b> | <b>Quintile 4</b> | <b>Quintile 5</b> | <b>P value</b> |
|                                | Fasting glucose (mmol/L)   | 5.08±0.02         | 5.08±0.02         | 5.07±0.02         | 5.06±0.02         | 5.03±0.02         | 0.310          |
|                                | Glycohemoglobin (%)        | 5.53±0.01         | 5.54±0.01         | 5.49±0.01         | 5.49±0.02         | 5.47±0.02         | <0.001         |
|                                | HOMA-IR                    | 1.50±0.05         | 1.49±0.05         | 1.55±0.06         | 1.48±0.05         | 1.35±0.05         | 0.030          |
|                                | HOMA-IS                    | 2.27±0.04         | 2.36±0.04         | 2.30±0.04         | 2.26±0.05         | 2.26±0.04         | 0.460          |
|                                | Triglyceride-glucose index | 8.66±0.01         | 8.61±0.01         | 8.59±0.01         | 8.59±0.01         | 8.56±0.01         | <0.001         |
|                                | HDL-cholesterol (mg/dL)    | 58.51±0.48        | 60.37±0.58        | 60.46±0.60        | 60.16±0.55        | 61.85±0.58        | <0.001         |
|                                |                            |                   |                   |                   |                   |                   |                |
| <b><math>\Delta</math> DAC</b> | <b>Variable</b>            | <b>Quintile 1</b> | <b>Quintile 2</b> | <b>Quintile 3</b> | <b>Quintile 4</b> | <b>Quintile 5</b> | <b>P value</b> |
|                                | Fasting glucose (mmol/L)   | 5.05±0.02         | 5.08±0.02         | 5.07±0.02         | 5.08±0.02         | 5.03±0.02         | 0.180          |
|                                | Glycohemoglobin (%)        | 5.52±0.02         | 5.56±0.01         | 5.51±0.01         | 5.48±0.02         | 5.46±0.01         | <0.001         |
|                                | HOMA-IR                    | 1.37±0.06         | 1.47±0.04         | 1.52±0.07         | 1.57±0.06         | 1.43±0.05         | 0.030          |
|                                | HOMA-IS                    | 2.22±0.05         | 2.26±0.05         | 2.41±0.04         | 2.29±0.04         | 2.26±0.04         | 0.003          |
|                                | Triglyceride-glucose index | 8.58±0.01         | 8.64±0.01         | 8.61±0.01         | 8.59±0.01         | 8.58±0.01         | 0.002          |
|                                | HDL-cholesterol (mg/dL)    | 61.35±0.61        | 59.42±0.49        | 59.70±0.57        | 60.12±0.60        | 60.94±0.51        | 0.020          |

Abbreviations: DAC, dietary total antioxidant capacity. Continuous variables were adjusted for survey weights of NHANES. Categorical variables were unweighted. One-way ANOVA for continuous variables and chi-square test of independence test for categorical variables were performed.

**Supplementary Table 14 Association between total DAC, dinner DAC, and  $\Delta$  DAC with biochemical indicators**

| <b>Exposure</b> | <b>Outcome</b>             | <b><math>\beta</math> value (95% CI)</b> | <b>P value</b> |
|-----------------|----------------------------|------------------------------------------|----------------|
| Total DAC       | Serum CRP                  | -0.18 (-0.22, -0.14)                     | <0.001         |
|                 | Glycohemoglobin            | -0.02 (-0.04, -0.01)                     | <0.001         |
|                 | Plasma fasting glucose     | -0.03 (-0.08, 0.03)                      | 0.391          |
|                 | HOMA-IR                    | -0.01 (-0.04, 0.03)                      | 0.750          |
|                 | HOMA-IS                    | -0.01 (-0.03, 0.01)                      | 0.398          |
|                 | HDL-cholesterol            | 0.10 (-0.09, 0.30)                       | 0.302          |
|                 | Triglyceride-glucose index | 0.00 (-0.02, 0.01)                       | 0.605          |
| Dinner DAC      | Serum CRP                  | -0.12 (-0.16, -0.09)                     | <0.001         |
|                 | Glycohemoglobin            | -0.01 (-0.03, 0.01)                      | 0.294          |
|                 | Plasma fasting glucose     | -0.04 (-0.11, 0.03)                      | 0.255          |
|                 | HOMA-IR                    | 0.02 (-0.03, 0.06)                       | 0.444          |
|                 | HOMA-IS                    | -0.02 (-0.04, 0.01)                      | 0.229          |
|                 | HDL-cholesterol            | -0.05 (-0.30, 0.19)                      | 0.674          |
|                 | Triglyceride-glucose index | -0.02 (-0.03, 0.00)                      | 0.011          |
| $\Delta$ DAC    | Serum CRP                  | -0.07 (-0.12, -0.03)                     | 0.001          |
|                 | Glycohemoglobin            | -0.01 (-0.02, 0.00)                      | 0.243          |
|                 | Plasma fasting glucose     | -0.03 (-0.08, 0.02)                      | 0.178          |
|                 | HOMA-IR                    | 0.03 (0.00, 0.05)                        | 0.037          |
|                 | HOMA-IS                    | -0.03 (-0.05, 0.00)                      | 0.019          |
|                 | HDL-cholesterol            | 0.08 (-0.07, 0.23)                       | 0.319          |
|                 | Triglyceride-glucose index | 0.00 (-0.01, 0.01)                       | 0.456          |

Abbreviations: DAC, dietary total antioxidant capacity; CRP, C-reactive protein.  $\Delta$  equals dinner DAC minus breakfast DAC.

Model was adjusted for, age, sex, race, education, family income, dietary energy intake, alcohol consumption per day, smoking status, physical activity, BMI, diabetes, hypertension, CVD, cancer, hyperlipidaemia, adherence to HEI-2015 score, and dietary supplement use.

Models for dinner DAC was further adjusted for breakfast DAC and lunch DAC.

**Supplementary Table 15 Associations of all-cause mortality with DAC (calculated by median) across three meals**

| Exposure                 | Case/N     | Model 1           |         | Model 2           |         | Model 3           |         |
|--------------------------|------------|-------------------|---------|-------------------|---------|-------------------|---------|
|                          |            | HR (95% CI)       | P value | HR (95% CI)       | P value | HR (95% CI)       | P value |
| <b>Total DAC</b>         |            |                   |         |                   |         |                   |         |
| Continuous total DAC     | 8566/56066 | 0.90 (0.89, 0.92) | <0.001  | 0.94 (0.92, 0.96) | <0.001  | 0.95 (0.93, 0.98) | <0.001  |
| Quintile 1               | 1210/11214 | 1.00 (Reference)  |         | 1.00 (Reference)  |         | 1.00 (Reference)  |         |
| Quintile 2               | 1635/11213 | 0.75 (0.68, 0.83) |         | 0.80 (0.72, 0.89) |         | 0.82 (0.74, 0.92) |         |
| Quintile 3               | 1771/11213 | 0.77 (0.67, 0.89) |         | 0.87 (0.75, 1.01) |         | 0.88 (0.76, 1.03) |         |
| Quintile 4               | 1952/11213 | 0.60 (0.53, 0.69) |         | 0.72 (0.63, 0.82) |         | 0.75 (0.65, 0.87) |         |
| Quintile 5               | 1998/11213 | 0.51 (0.45, 0.57) | <0.001* | 0.64 (0.56, 0.73) | <0.001* | 0.70 (0.61, 0.80) | <0.001* |
| <b>Breakfast DAC</b>     |            |                   |         |                   |         |                   |         |
| Continuous breakfast DAC | 8566/56066 | 0.91 (0.88, 0.93) | <0.001  | 0.97 (0.94, 1.00) | 0.032   | 1.00 (0.97, 1.03) | 0.777   |
| Quintile 1               | 954/11214  | 1.00 (Reference)  |         | 1.00 (Reference)  |         | 1.00 (Reference)  |         |
| Quintile 2               | 1479/11213 | 0.95 (0.81, 1.11) |         | 0.92 (0.78, 1.09) |         | 0.93 (0.80, 1.10) |         |
| Quintile 3               | 1921/11213 | 0.87 (0.76, 0.99) |         | 0.87 (0.76, 1.00) |         | 0.88 (0.77, 1.02) |         |
| Quintile 4               | 1917/11213 | 0.86 (0.74, 1.00) |         | 0.95 (0.81, 1.13) |         | 0.98 (0.83, 1.15) |         |
| Quintile 5               | 2295/11213 | 0.72 (0.63, 0.83) | <0.001* | 0.87 (0.75, 1.00) | 0.136*  | 0.93 (0.80, 1.09) | 0.754*  |
| <b>Lunch DAC</b>         |            |                   |         |                   |         |                   |         |
| Continuous lunch DAC     | 8566/56066 | 0.92 (0.89, 0.95) | <0.001  | 0.95 (0.93, 0.98) | 0.004   | 0.96 (0.93, 0.99) | 0.011   |
| Quintile 1               | 1208/11214 | 1.00 (Reference)  |         | 1.00 (Reference)  |         | 1.00 (Reference)  |         |
| Quintile 2               | 1739/11213 | 1.12 (0.98, 1.27) |         | 1.06 (0.92, 1.21) |         | 1.02 (0.89, 1.17) |         |
| Quintile 3               | 1827/11213 | 1.05 (0.93, 1.19) |         | 1.03 (0.92, 1.17) |         | 1.01 (0.89, 1.14) |         |
| Quintile 4               | 1914/11213 | 1.00 (0.88, 1.13) |         | 1.05 (0.92, 1.19) |         | 1.01 (0.90, 1.15) |         |
| Quintile 5               | 1878/11213 | 0.82 (0.72, 0.92) | <0.001* | 0.91 (0.80, 1.04) | 0.084*  | 0.92 (0.80, 1.05) | 0.187*  |

| Exposure              | Case/N     | Model 1           |         | Model 2           |         | Model 3           |         |
|-----------------------|------------|-------------------|---------|-------------------|---------|-------------------|---------|
|                       |            | HR (95% CI)       | P value | HR (95% CI)       | P value | HR (95% CI)       | P value |
| <b>(continued)</b>    |            |                   |         |                   |         |                   |         |
| <b>Dinner DAC</b>     |            |                   |         |                   |         |                   |         |
| Continuous dinner DAC | 8566/56066 | 0.88 (0.84, 0.91) | <0.001  | 0.93 (0.89, 0.97) | 0.001   | 0.94 (0.89, 0.98) | 0.003   |
| Quintile 1            | 1537/11214 | 1.00 (Reference)  |         | 1.00 (Reference)  |         | 1.00 (Reference)  |         |
| Quintile 2            | 2043/11213 | 0.92 (0.83, 1.02) |         | 0.90 (0.81, 1.00) |         | 0.87 (0.78, 0.96) |         |
| Quintile 3            | 1806/11213 | 0.86 (0.77, 0.96) |         | 0.91 (0.81, 1.01) |         | 0.85 (0.76, 0.95) |         |
| Quintile 4            | 1526/11213 | 0.76 (0.67, 0.87) |         | 0.84 (0.74, 0.96) |         | 0.80 (0.70, 0.91) |         |
| Quintile 5            | 1654/11213 | 0.68 (0.60, 0.77) | <0.001* | 0.79 (0.70, 0.90) | <0.001* | 0.77 (0.68, 0.87) | <0.001* |
| <b>Δ DAC</b>          |            |                   |         |                   |         |                   |         |
| Continuous Δ DAC      | 8566/56066 | 1.00 (0.98, 1.02) | 0.811   | 0.99 (0.97, 1.01) | 0.203   | 0.98 (0.95, 1.00) | 0.057   |
| Quintile 1            | 2183/11214 | 1.00 (Reference)  |         | 1.00 (Reference)  |         | 1.00 (Reference)  |         |
| Quintile 2            | 1922/11213 | 1.13 (1.01, 1.26) |         | 1.01 (0.91, 1.12) |         | 0.96 (0.86, 1.07) |         |
| Quintile 3            | 1778/11213 | 1.28 (1.15, 1.43) |         | 1.08 (0.97, 1.21) |         | 1.02 (0.90, 1.15) |         |
| Quintile 4            | 1367/11213 | 1.11 (0.99, 1.24) |         | 1.02 (0.92, 1.12) |         | 0.96 (0.86, 1.06) |         |
| Quintile 5            | 1316/11213 | 0.85 (0.75, 0.97) | 0.067*  | 0.84 (0.74, 0.95) | 0.018*  | 0.82 (0.72, 0.93) | 0.003*  |

Abbreviations: HRs, hazard ratio; CIs, confidence intervals; DAC, dietary total antioxidant capacity; HEI-2015, Healthy Eating Index 2015; BMI, body mass index; CVD, cardiovascular disease.

\* P for trend across the quintile of DAC. HR (95%CI) was estimated by weighted Cox regression analyses. Δ equals dinner DAC minus breakfast DAC.

Model 1 adjusted for, age, sex, and race.

Model 2 further adjusted for education, family income, dietary energy intake, alcohol consumption per day, smoking status, physical activity, and BMI.

Model 3 further adjusted for diabetes, hypertension, CVD, cancer, hyperlipidaemia, adherence to HEI-2015 score, and dietary supplement use.

Models for breakfast DAC, lunch DAC, and dinner DAC were further adjusted except for the one that defined the group.

**Supplementary Table 16 Associations of CVD mortality with quintiles of DAC (calculated by median) across three meals**

| Exposure                 | Case/N     | Model 1           |         | Model 2           |         | Model 3           |         |
|--------------------------|------------|-------------------|---------|-------------------|---------|-------------------|---------|
|                          |            | HR (95% CI)       | P value | HR (95% CI)       | P value | HR (95% CI)       | P value |
| <b>Total DAC</b>         |            |                   |         |                   |         |                   |         |
| Continuous total DAC     | 2196/56066 | 0.90 (0.87, 0.93) | <0.001  | 0.94 (0.91, 0.98) | 0.002   | 0.98 (0.94, 1.02) | 0.265   |
| Quintile 1               | 282/11214  | 1.00 (Reference)  |         | 1.00 (Reference)  |         | 1.00 (Reference)  |         |
| Quintile 2               | 416/11213  | 0.74 (0.58, 0.94) |         | 0.75 (0.60, 0.94) |         | 0.77 (0.61, 0.97) |         |
| Quintile 3               | 457/11213  | 0.84 (0.60, 1.19) |         | 0.92 (0.63, 1.33) |         | 0.96 (0.66, 1.40) |         |
| Quintile 4               | 537/11213  | 0.67 (0.51, 0.88) |         | 0.79 (0.60, 1.03) |         | 0.89 (0.67, 1.19) |         |
| Quintile 5               | 504/11213  | 0.49 (0.38, 0.62) | <0.001* | 0.63 (0.49, 0.81) | 0.002*  | 0.78 (0.59, 1.02) | 0.309*  |
| <b>Breakfast DAC</b>     |            |                   |         |                   |         |                   |         |
| Continuous breakfast DAC | 2196/56066 | 0.88 (0.83, 0.93) | <0.001  | 0.95 (0.90, 1.01) | 0.108   | 1.00 (0.94, 1.06) | 0.954   |
| Quintile 1               | 214/11214  | 1.00 (Reference)  |         | 1.00 (Reference)  |         | 1.00 (Reference)  |         |
| Quintile 2               | 368/11213  | 1.02 (0.75, 1.38) |         | 0.92 (0.65, 1.30) |         | 0.92 (0.66, 1.29) |         |
| Quintile 3               | 507/11213  | 0.84 (0.65, 1.09) |         | 0.76 (0.57, 1.01) |         | 0.77 (0.58, 1.02) |         |
| Quintile 4               | 500/11213  | 0.86 (0.66, 1.11) |         | 0.88 (0.66, 1.16) |         | 0.92 (0.69, 1.23) |         |
| Quintile 5               | 607/11213  | 0.71 (0.56, 0.89) | <0.001* | 0.81 (0.63, 1.04) | 0.118*  | 0.92 (0.71, 1.20) | 0.874*  |
| <b>Lunch DAC</b>         |            |                   |         |                   |         |                   |         |
| Continuous lunch DAC     | 2196/56066 | 0.94 (0.88, 0.99) | 0.026   | 0.99 (0.94, 1.05) | 0.822   | 1.00 (0.94, 1.07) |         |
| Quintile 1               | 260/11214  | 1.00 (Reference)  |         | 1.00 (Reference)  |         | 1.00 (Reference)  |         |
| Quintile 2               | 451/11213  | 1.51 (1.12, 2.02) |         | 1.37 (0.98, 1.92) |         | 1.31 (0.95, 1.80) |         |
| Quintile 3               | 514/11213  | 1.56 (1.23, 2.00) |         | 1.50 (1.16, 1.93) |         | 1.46 (1.15, 1.85) |         |
| Quintile 4               | 495/11213  | 1.29 (1.01, 1.66) |         | 1.35 (1.03, 1.76) |         | 1.31 (1.01, 1.69) |         |
| Quintile 5               | 476/11213  | 1.04 (0.80, 1.37) | 0.136*  | 1.21 (0.91, 1.61) | 0.638*  | 1.25 (0.95, 1.65) | 0.337*  |

| Exposure              | Case/N     | Model 1           |         | Model 2           |         | Model 3           |         |
|-----------------------|------------|-------------------|---------|-------------------|---------|-------------------|---------|
|                       |            | HR (95% CI)       | P value | HR (95% CI)       | P value | HR (95% CI)       | P value |
| <b>(continued)</b>    |            |                   |         |                   |         |                   |         |
| <b>Dinner DAC</b>     |            |                   |         |                   |         |                   |         |
| Continuous dinner DAC | 2196/56066 | 0.85 (0.79, 0.90) | <0.001  | 0.90 (0.85, 0.96) | 0.001   | 0.93 (0.87, 0.99) | 0.025   |
| Quintile 1            | 355/11214  | 1.00 (Reference)  |         | 1.00 (Reference)  |         | 1.00 (Reference)  |         |
| Quintile 2            | 548/11213  | 0.93 (0.76, 1.13) |         | 0.86 (0.69, 1.06) |         | 0.81 (0.65, 1.02) |         |
| Quintile 3            | 478/11213  | 0.88 (0.70, 1.11) |         | 0.87 (0.68, 1.11) |         | 0.82 (0.64, 1.06) |         |
| Quintile 4            | 376/11213  | 0.74 (0.58, 0.93) |         | 0.77 (0.61, 0.98) |         | 0.76 (0.60, 0.96) |         |
| Quintile 5            | 439/11213  | 0.71 (0.57, 0.88) | <0.001* | 0.80 (0.64, 1.00) | 0.030*  | 0.84 (0.66, 1.06) | 0.132*  |
| <b>Δ DAC</b>          |            |                   |         |                   |         |                   |         |
| Continuous Δ DAC      | 2196/56066 | 1.00 (0.97, 1.03) | 0.992   | 0.98 (0.95, 1.02) | 0.346   | 0.97 (0.93, 1.01) | 0.097   |
| Quintile 1            | 571/11214  | 1.00 (Reference)  |         | 1.00 (Reference)  |         | 1.00 (Reference)  |         |
| Quintile 2            | 506/11213  | 1.17 (0.97, 1.41) |         | 1.03 (0.85, 1.24) |         | 0.94 (0.78, 1.14) |         |
| Quintile 3            | 447/11213  | 1.34 (1.07, 1.67) |         | 1.11 (0.88, 1.39) |         | 0.98 (0.77, 1.25) |         |
| Quintile 4            | 339/11213  | 1.07 (0.86, 1.32) |         | 0.95 (0.77, 1.18) |         | 0.86 (0.69, 1.08) |         |
| Quintile 5            | 333/11213  | 0.87 (0.71, 1.05) | 0.223*  | 0.84 (0.69, 1.02) | 0.084*  | 0.81 (0.67, 0.99) | 0.026*  |

Abbreviations: HRs, hazard ratios; CIs, confidence intervals; DAC, dietary total antioxidant capacity; HEI-2015, Healthy Eating Index 2015; BMI, body mass index; CVD, cardiovascular disease.

\* P for trend across the quintile of DAC. HR (95%CI) was estimated by weighted Cox regression analyses. Δ equals dinner DAC minus breakfast DAC.

Model 1 adjusted for, age, sex, and race.

Model 2 further adjusted for education, family income, dietary energy intake, alcohol consumption per day, smoking status, physical activity, and BMI.

Model 3 further adjusted for diabetes, hypertension, CVD, cancer, hyperlipidaemia, adherence to HEI-2015 score, and dietary supplement use.

Models for breakfast DAC, lunch DAC, and dinner DAC were further adjusted except for the one that defined the group.

**Supplementary Table 17 Associations of cancer mortality with quintiles of DAC (calculated by median) across three meals**

| Exposure                 | Case/N     | Model 1           |         | Model 2           |         | Model 3           |         |
|--------------------------|------------|-------------------|---------|-------------------|---------|-------------------|---------|
|                          |            | HR (95% CI)       | P value | HR (95% CI)       | P value | HR (95% CI)       | P value |
| <b>Total DAC</b>         |            |                   |         |                   |         |                   |         |
| Continuous total DAC     | 1984/56066 | 0.92 (0.89, 0.96) | <0.001  | 0.95 (0.91, 1.00) | 0.039   | 0.96 (0.92, 1.01) | 0.132   |
| Quintile 1               | 294/11214  | 1.00 (Reference)  |         | 1.00 (Reference)  |         | 1.00 (Reference)  |         |
| Quintile 2               | 409/11213  | 1.05 (0.82, 1.34) |         | 1.10 (0.85, 1.42) |         | 1.14 (0.87, 1.48) |         |
| Quintile 3               | 417/11213  | 1.05 (0.82, 1.34) |         | 1.16 (0.90, 1.50) |         | 1.18 (0.90, 1.54) |         |
| Quintile 4               | 431/11213  | 0.72 (0.57, 0.91) |         | 0.82 (0.65, 1.04) |         | 0.86 (0.66, 1.11) |         |
| Quintile 5               | 433/11213  | 0.66 (0.53, 0.83) | <0.001* | 0.79 (0.61, 1.02) | 0.001*  | 0.83 (0.62, 1.12) | 0.016*  |
| <b>Breakfast DAC</b>     |            |                   |         |                   |         |                   |         |
| Continuous breakfast DAC | 1984/56066 | 0.90 (0.83, 0.96) | 0.004   | 0.95 (0.88, 1.02) | 0.137   | 0.96 (0.88, 1.04) | 0.33    |
| Quintile 1               | 266/11214  | 1.00 (Reference)  |         | 1.00 (Reference)  |         | 1.00 (Reference)  |         |
| Quintile 2               | 360/11213  | 0.95 (0.72, 1.26) |         | 0.86 (0.65, 1.14) |         | 0.87 (0.65, 1.15) |         |
| Quintile 3               | 419/11213  | 0.79 (0.62, 1.02) |         | 0.74 (0.57, 0.96) |         | 0.75 (0.57, 0.97) |         |
| Quintile 4               | 445/11213  | 0.86 (0.65, 1.13) |         | 0.88 (0.67, 1.16) |         | 0.91 (0.69, 1.21) |         |
| Quintile 5               | 494/11213  | 0.71 (0.54, 0.92) | 0.002*  | 0.78 (0.61, 1.00) | 0.132*  | 0.82 (0.63, 1.08) | 0.366*  |
| <b>Lunch DAC</b>         |            |                   |         |                   |         |                   |         |
| Continuous lunch DAC     | 1984/56066 | 0.95 (0.89, 1.01) | 0.104   | 0.97 (0.91, 1.04) | 0.44    | 0.98 (0.92, 1.05) | 0.599   |
| Quintile 1               | 329/11214  | 1.00 (Reference)  |         | 1.00 (Reference)  |         | 1.00 (Reference)  |         |
| Quintile 2               | 380/11213  | 1.03 (0.80, 1.33) |         | 0.92 (0.71, 1.19) |         | 0.90 (0.70, 1.18) |         |
| Quintile 3               | 399/11213  | 0.97 (0.77, 1.22) |         | 0.88 (0.70, 1.12) |         | 0.86 (0.67, 1.10) |         |
| Quintile 4               | 463/11213  | 1.12 (0.86, 1.45) |         | 1.08 (0.83, 1.40) |         | 1.07 (0.82, 1.39) |         |
| Quintile 5               | 413/11213  | 0.88 (0.67, 1.15) | 0.482*  | 0.91 (0.69, 1.21) | 0.976*  | 0.94 (0.70, 1.27) | 0.797*  |

| Exposure              | Case/N     | Model 1           |         | Model 2           |         | Model 3           |         |
|-----------------------|------------|-------------------|---------|-------------------|---------|-------------------|---------|
|                       |            | HR (95% CI)       | P value | HR (95% CI)       | P value | HR (95% CI)       | P value |
| <b>(continued)</b>    |            |                   |         |                   |         |                   |         |
| <b>Dinner DAC</b>     |            |                   |         |                   |         |                   |         |
| Continuous dinner DAC | 1984/56066 | 0.93 (0.85, 1.02) | 0.134   | 0.98 (0.89, 1.07) | 0.642   | 0.98 (0.90, 1.08) | 0.753   |
| Quintile 1            | 383/11214  | 1.00 (Reference)  |         | 1.00 (Reference)  |         | 1.00 (Reference)  |         |
| Quintile 2            | 469/11213  | 1.07 (0.86, 1.33) |         | 1.00 (0.79, 1.27) |         | 0.97 (0.76, 1.23) |         |
| Quintile 3            | 386/11213  | 0.90 (0.71, 1.15) |         | 0.90 (0.71, 1.15) |         | 0.86 (0.67, 1.10) |         |
| Quintile 4            | 367/11213  | 0.87 (0.66, 1.14) |         | 0.91 (0.70, 1.19) |         | 0.88 (0.68, 1.13) |         |
| Quintile 5            | 379/11213  | 0.78 (0.60, 1.02) | 0.016*  | 0.86 (0.65, 1.13) | 0.186*  | 0.84 (0.64, 1.09) | 0.133*  |
| <b>Δ DAC</b>          |            |                   |         |                   |         |                   |         |
| Continuous Δ DAC      | 1984/56066 | 1.03 (0.97, 1.08) | 0.349   | 1.02 (0.96, 1.08) | 0.522   | 1.02 (0.95, 1.09) | 0.594   |
| Quintile 1            | 484/11214  | 1.00 (Reference)  |         | 1.00 (Reference)  |         | 1.00 (Reference)  |         |
| Quintile 2            | 431/11213  | 1.04 (0.84, 1.28) |         | 0.94 (0.77, 1.16) |         | 0.91 (0.73, 1.14) |         |
| Quintile 3            | 389/11213  | 1.16 (0.93, 1.44) |         | 0.97 (0.77, 1.21) |         | 0.93 (0.72, 1.19) |         |
| Quintile 4            | 348/11213  | 1.15 (0.92, 1.45) |         | 1.05 (0.83, 1.32) |         | 1.00 (0.77, 1.30) |         |
| Quintile 5            | 332/11213  | 0.95 (0.72, 1.25) | 0.931*  | 0.93 (0.71, 1.23) | 0.885*  | 0.91 (0.69, 1.22) | 0.762*  |

Abbreviations: HRs, hazard ratios; CIs, confidence intervals; DAC, dietary total antioxidant capacity; HEI-2015, Healthy Eating Index 2015; BMI, body mass index; CVD, cardiovascular disease.

\* P for trend across the quintile of DAC. HR (95%CI) was estimated by weighted Cox regression analyses. Δ equals dinner DAC minus breakfast DAC.

Model 1 adjusted for, age, sex, and race.

Model 2 further adjusted for education, family income, dietary energy intake, alcohol consumption per day, smoking status, physical activity, and BMI.

Model 3 further adjusted for diabetes, hypertension, CVD, cancer, hyperlipidaemia, adherence to HEI-2015 score, and dietary supplement use.

Models for breakfast DAC, lunch DAC, and dinner DAC were further adjusted except for the one that defined the group.

**Supplementary Table 18 All-cause, CVD, and cancer mortality risk by quintiles of total or dinner DAC plus midnight**

| Exposure                                       | All-cause mortality |         | CVD mortality     |         | Cancer mortality  |         |
|------------------------------------------------|---------------------|---------|-------------------|---------|-------------------|---------|
|                                                | HR (95% CI)         | P value | HR (95% CI)       | P value | HR (95% CI)       | P value |
| <b>Total DAC plus midnight DAC<sup>a</sup></b> |                     |         |                   |         |                   |         |
| Continuous total DAC plus midnight             | 0.98 (0.96, 0.99)   | 0.007   | 0.97 (0.94, 1.01) | 0.105   | 0.98 (0.95, 1.02) | 0.327   |
| Q1 (<1.79)                                     | 1.00 (Reference)    |         | 1.00 (Reference)  |         | 1.00 (Reference)  |         |
| Q2 (1.79 to 2.73)                              | 0.86 (0.74, 1.00)   |         | 0.87 (0.65, 1.18) |         | 1.00 (0.76, 1.32) |         |
| Q3 (2.73 to 3.97)                              | 0.89 (0.77, 1.03)   |         | 0.86 (0.63, 1.18) |         | 1.01 (0.79, 1.29) |         |
| Q4 (3.97 to 6.00)                              | 0.80 (0.69, 0.93)   |         | 0.91 (0.70, 1.18) |         | 0.84 (0.64, 1.09) |         |
| Q5 (> 6.00)                                    | 0.77 (0.66, 0.90)   | 0.002*  | 0.69 (0.53, 0.90) | 0.028*  | 0.83 (0.64, 1.08) | 0.068*  |
| <b>Dinner DAC plus midnight DAC</b>            |                     |         |                   |         |                   |         |
| Continuous dinner DAC plus midnight            | 0.97 (0.94, 1.00)   | 0.037   | 0.92 (0.88, 0.98) | 0.004   | 1.01 (0.94, 1.07) | 0.851   |
| Q1 (<0.19)                                     | 1.00 (Reference)    |         | 1.00 (Reference)  |         | 1.00 (Reference)  |         |
| Q2 (0.19 to 0.56)                              | 0.94 (0.84, 1.05)   |         | 0.90 (0.72, 1.12) |         | 1.05 (0.83, 1.32) |         |
| Q3 (0.56 to 1.09)                              | 0.86 (0.77, 0.96)   |         | 0.83 (0.66, 1.05) |         | 0.77 (0.61, 0.96) |         |
| Q4 (1.09 to 2.12)                              | 0.83 (0.73, 0.94)   |         | 0.86 (0.69, 1.06) |         | 0.86 (0.67, 1.11) |         |
| Q5 (> 2.12)                                    | 0.86 (0.75, 0.99)   | 0.002*  | 0.75 (0.59, 0.96) | 0.014*  | 1.01 (0.76, 1.34) | 0.490*  |
| <b>Midnight DAC</b>                            |                     |         |                   |         |                   |         |
| Continuous midnight DAC                        | 1.05 (0.97, 1.13)   | 0.22    | 0.90 (0.79, 1.02) | 0.106   | 1.00 (0.86, 1.15) | 0.96    |
| Q1 (<-0.09)                                    | 1.00 (Reference)    |         | 1.00 (Reference)  |         | 1.00 (Reference)  |         |
| Q2 (-0.09 to 0.02)                             | 0.87 (0.78, 0.98)   |         | 0.90 (0.71, 1.15) |         | 0.83 (0.67, 1.05) |         |
| Q3 (0.02 to 0.11)                              | 1.03 (0.92, 1.15)   |         | 0.94 (0.72, 1.22) |         | 0.98 (0.79, 1.21) |         |
| Q4 (0.11 to 0.23)                              | 1.05 (0.91, 1.22)   |         | 1.08 (0.79, 1.49) |         | 0.93 (0.69, 1.25) |         |
| Q5 (> 0.23)                                    | 1.02 (0.89, 1.16)   | 0.296*  | 0.90 (0.68, 1.20) | 0.801*  | 0.84 (0.65, 1.09) | 0.366*  |

Abbreviations: HRs, hazard ratios; CIs, confidence intervals; DAC, dietary total antioxidant capacity; HEI-2015, Healthy Eating Index 2015; BMI, body mass index; CVD, cardiovascular disease.

<sup>a</sup> DAC intake from midnight snack after dinner.

HR (95%CI) was estimated by weighted Cox regression analyses.

Model was adjusted for age, sex and race, education, family income, dietary energy intake, alcohol consumption per day, smoking status, physical activity, BMI, diabetes, hypertension, CVD, cancer, hyperlipidaemia, adherence to HEI-2015 score, and dietary supplement use. .

Models for total DAC plus midnight DAC, dinner DAC plus midnight DAC, and midnight DAC were further adjusted except for the one that defined the group.

**Supplementary Table 19 All-cause, CVD, and cancer mortality by DAC quintiles plus DAC from snack, coffee, and/or tea**

| Exposure                                                    | All-cause mortality |                   |         | CVD mortality |                   |         | Cancer mortality |                   |         |
|-------------------------------------------------------------|---------------------|-------------------|---------|---------------|-------------------|---------|------------------|-------------------|---------|
|                                                             | Case/N              | HR(95% CI)        | P value | Case/N        | HR(95% CI)        | P value | Case/N           | HR(95% CI)        | P value |
| <b>Total DAC (including DAC from snack, coffee and tea)</b> |                     |                   |         |               |                   |         |                  |                   |         |
| Continuous total DAC                                        | 8566/56066          | 0.99 (0.99, 1.00) | 0.001   | 2196/56066    | 1.00 (0.98, 1.01) | 0.399   | 1984/56066       | 1.00 (0.99, 1.01) | 0.722   |
| Quintile 1                                                  | 1044/11214          | 1.00 (Reference)  |         | 262/11214     | 1.00 (Reference)  |         | 216/11214        | 1.00 (Reference)  |         |
| Quintile 2                                                  | 1470/11213          | 0.82 (0.70, 0.96) |         | 377/11213     | 0.87 (0.66, 1.15) |         | 321/11213        | 0.88 (0.63, 1.22) |         |
| Quintile 3                                                  | 1903/11213          | 0.80 (0.70, 0.90) |         | 467/11213     | 0.75 (0.59, 0.96) |         | 460/11213        | 0.93 (0.70, 1.24) |         |
| Quintile 4                                                  | 1972/11213          | 0.64 (0.56, 0.73) |         | 521/11213     | 0.72 (0.55, 0.93) |         | 443/11213        | 0.72 (0.53, 0.98) |         |
| Quintile 5                                                  | 2177/11213          | 0.66 (0.57, 0.76) | <0.001* | 569/11213     | 0.72 (0.55, 0.94) | 0.008*  | 544/11213        | 0.84 (0.61, 1.15) | 0.177*  |
| <b>Total DAC (including DAC from snack)</b>                 |                     |                   |         |               |                   |         |                  |                   |         |
| Continuous total DAC                                        | 8566/56066          | 0.97 (0.95, 0.98) | <0.001  | 2196/56066    | 0.97 (0.94, 1.00) | 0.023   | 1984/56066       | 0.98 (0.95, 1.02) | 0.336   |
| Quintile 1                                                  | 1251/11214          | 1.00 (Reference)  |         | 318/11214     | 1.00 (Reference)  |         | 309/11214        | 1.00 (Reference)  |         |
| Quintile 2                                                  | 1797/11213          | 0.79 (0.70, 0.91) |         | 465/11213     | 0.69 (0.52, 0.91) |         | 412/11213        | 0.85 (0.66, 1.08) |         |
| Quintile 3                                                  | 1913/11213          | 0.80 (0.71, 0.90) |         | 495/11213     | 0.75 (0.58, 0.97) |         | 454/11213        | 0.96 (0.75, 1.23) |         |
| Quintile 4                                                  | 1875/11213          | 0.69 (0.60, 0.79) |         | 497/11213     | 0.67 (0.52, 0.85) |         | 411/11213        | 0.80 (0.60, 1.08) |         |
| Quintile 5                                                  | 1730/11213          | 0.65 (0.55, 0.77) | <0.001* | 421/11213     | 0.61 (0.45, 0.81) | 0.004*  | 398/11213        | 0.87 (0.60, 1.27) | 0.501*  |
| <b>Total DAC (including DAC from coffee)</b>                |                     |                   |         |               |                   |         |                  |                   |         |
| Continuous total DAC                                        | 8566/56066          | 0.99 (0.98, 0.99) | <0.001  | 2196/56066    | 0.98 (0.97, 1.00) | 0.023   | 1984/56066       | 1.00 (0.99, 1.01) | 0.432   |
| Quintile 1                                                  | 1010/11214          | 1.00 (Reference)  |         | 240/11214     | 1.00 (Reference)  |         | 235/11214        | 1.00 (Reference)  |         |
| Quintile 2                                                  | 1388/11213          | 0.82 (0.71, 0.95) |         | 390/11213     | 0.97 (0.74, 1.28) |         | 258/11213        | 0.72 (0.50, 1.06) |         |
| Quintile 3                                                  | 1835/11213          | 0.73 (0.64, 0.84) |         | 450/11213     | 0.63 (0.49, 0.80) |         | 426/11213        | 0.83 (0.64, 1.09) |         |

| Exposure                                                                  | All-cause mortality |                   |         | CVD mortality |                   |         | Cancer mortality |                   |         |
|---------------------------------------------------------------------------|---------------------|-------------------|---------|---------------|-------------------|---------|------------------|-------------------|---------|
|                                                                           | Case/N              | HR(95% CI)        | P value | Case/N        | HR(95% CI)        | P value | Case/N           | HR(95% CI)        | P value |
| <b>(continued)</b>                                                        |                     |                   |         |               |                   |         |                  |                   |         |
| Quintile 4                                                                | 2124/11213          | 0.65 (0.57, 0.75) |         | 540/11213     | 0.68 (0.52, 0.88) |         | 521/11213        | 0.74 (0.55, 0.99) |         |
| Quintile 5                                                                | 2209/11213          | 0.61 (0.52, 0.71) | <0.001* | 576/11213     | 0.62 (0.48, 0.81) | <0.001* | 544/11213        | 0.72 (0.54, 0.95) | 0.056*  |
| <b>Total DAC (including DAC from tea)</b>                                 |                     |                   |         |               |                   |         |                  |                   |         |
| Continuous total DAC                                                      | 8566/56066          | 0.99 (0.98, 1.00) | 0.017   | 2196/56066    | 1.01 (0.99, 1.03) | 0.286   | 1984/56066       | 0.99 (0.97, 1.01) | 0.219   |
| Quintile 1                                                                | 1308/11214          | 1.00 (Reference)  |         | 298/11214     | 1.00 (Reference)  |         | 315/11214        | 1.00 (Reference)  |         |
| Quintile 2                                                                | 1693/11213          | 0.83 (0.73, 0.95) |         | 421/11213     | 0.84 (0.64, 1.11) |         | 424/11213        | 1.09 (0.84, 1.42) |         |
| Quintile 3                                                                | 1764/11213          | 0.77 (0.67, 0.88) |         | 465/11213     | 0.85 (0.65, 1.12) |         | 386/11213        | 0.87 (0.67, 1.15) |         |
| Quintile 4                                                                | 1889/11213          | 0.77 (0.66, 0.89) |         | 503/11213     | 0.90 (0.66, 1.24) |         | 442/11213        | 0.94 (0.74, 1.19) |         |
| Quintile 5                                                                | 1912/11213          | 0.75 (0.66, 0.86) | <0.001* | 509/11213     | 0.86 (0.66, 1.12) | 0.582*  | 417/11213        | 0.85 (0.63, 1.13) | 0.108*  |
| <b>Breakfast DAC (including DAC from breakfast snack, coffee and tea)</b> |                     |                   |         |               |                   |         |                  |                   |         |
| Continuous breakfast DAC                                                  | 8566/56066          | 0.99 (0.98, 1.00) | 0.002   | 2196/56066    | 0.99 (0.97, 1.00) | 0.052   | 1984/56066       | 1.00 (0.99, 1.02) | 0.74    |
| Quintile 1                                                                | 939/11214           | 1.00 (Reference)  |         | 215/11214     | 1.00 (Reference)  |         | 255/11214        | 1.00 (Reference)  |         |
| Quintile 2                                                                | 1466/11213          | 0.88 (0.76, 1.01) |         | 381/11213     | 0.79 (0.58, 1.06) |         | 330/11213        | 1.06 (0.80, 1.40) |         |
| Quintile 3                                                                | 1732/11213          | 0.93 (0.79, 1.09) |         | 436/11213     | 0.82 (0.62, 1.08) |         | 355/11213        | 0.96 (0.72, 1.28) |         |
| Quintile 4                                                                | 2254/11213          | 0.83 (0.72, 0.96) |         | 631/11213     | 0.82 (0.64, 1.07) |         | 483/11213        | 0.91 (0.67, 1.23) |         |
| Quintile 5                                                                | 2175/11213          | 0.76 (0.65, 0.88) | <0.001* | 533/11213     | 0.67 (0.50, 0.89) | 0.010*  | 561/11213        | 0.96 (0.71, 1.30) | 0.537*  |
| <b>Breakfast DAC (including DAC from breakfast snack)</b>                 |                     |                   |         |               |                   |         |                  |                   |         |
| Continuous breakfast DAC                                                  | 8566/56066          | 1.00 (0.98, 1.02) | 0.849   | 2196/56066    | 0.99 (0.95, 1.03) | 0.571   | 1984/56066       | 0.99 (0.94, 1.05) | 0.787   |

| Exposure                                                   | All-cause mortality |                   |         | CVD mortality |                   |         | Cancer mortality |                   |         |
|------------------------------------------------------------|---------------------|-------------------|---------|---------------|-------------------|---------|------------------|-------------------|---------|
|                                                            | Case/N              | HR(95% CI)        | P value | Case/N        | HR(95% CI)        | P value | Case/N           | HR(95% CI)        | P value |
| <b>(continued)</b>                                         |                     |                   |         |               |                   |         |                  |                   |         |
| Quintile 1                                                 | 908/11214           | 1.00 (Reference)  |         | 194/11214     | 1.00 (Reference)  |         | 233/11214        | 1.00 (Reference)  |         |
| Quintile 2                                                 | 1498/11213          | 1.03 (0.89, 1.20) |         | 381/11213     | 1.02 (0.72, 1.45) |         | 392/11213        | 1.26 (0.94, 1.67) |         |
| Quintile 3                                                 | 1956/11213          | 0.97 (0.85, 1.11) |         | 514/11213     | 0.89 (0.65, 1.21) |         | 426/11213        | 1.06 (0.79, 1.41) |         |
| Quintile 4                                                 | 1965/11213          | 1.06 (0.92, 1.22) |         | 535/11213     | 1.08 (0.79, 1.48) |         | 454/11213        | 1.23 (0.93, 1.64) |         |
| Quintile 5                                                 | 2239/11213          | 1.03 (0.88, 1.20) | 0.589*  | 572/11213     | 0.95 (0.72, 1.26) | 0.972*  | 479/11213        | 1.11 (0.79, 1.55) | 0.765*  |
| <b>Breakfast DAC (including DAC from breakfast coffee)</b> |                     |                   |         |               |                   |         |                  |                   |         |
| Continuous breakfast DAC                                   | 8566/56066          | 0.99 (0.98, 1.00) | 0.007   | 2196/56066    | 0.98 (0.97, 1.00) | 0.048   | 1984/56066       | 1.00 (0.98, 1.02) | 0.979   |
| Quintile 1                                                 | 947/11214           | 1.00 (Reference)  |         | 220/11214     | 1.00 (Reference)  |         | 258/11214        | 1.00 (Reference)  |         |
| Quintile 2                                                 | 1450/11213          | 0.84 (0.72, 0.98) |         | 383/11213     | 0.76 (0.57, 0.99) |         | 324/11213        | 0.90 (0.66, 1.22) |         |
| Quintile 3                                                 | 1676/11213          | 0.90 (0.78, 1.04) |         | 427/11213     | 0.82 (0.65, 1.04) |         | 340/11213        | 0.76 (0.56, 1.01) |         |
| Quintile 4                                                 | 2255/11213          | 0.80 (0.69, 0.93) |         | 607/11213     | 0.73 (0.57, 0.93) |         | 497/11213        | 0.81 (0.58, 1.13) |         |
| Quintile 5                                                 | 2238/11213          | 0.76 (0.65, 0.89) | <0.001* | 559/11213     | 0.68 (0.52, 0.89) | 0.012*  | 565/11213        | 0.83 (0.62, 1.12) | 0.305*  |
| <b>Breakfast DAC (including DAC from breakfast tea)</b>    |                     |                   |         |               |                   |         |                  |                   |         |
| Continuous breakfast DAC                                   | 8566/56066          | 1.00 (0.98, 1.02) | 0.974   | 2196/56066    | 1.01 (0.97, 1.04) | 0.792   | 1984/56066       | 0.98 (0.94, 1.03) | 0.467   |
| Quintile 1                                                 | 932/11214           | 1.00 (Reference)  |         | 197/11214     | 1.00 (Reference)  |         | 255/11214        | 1.00 (Reference)  |         |
| Quintile 2                                                 | 1511/11213          | 0.88 (0.76, 1.02) |         | 375/11213     | 0.94 (0.66, 1.32) |         | 386/11213        | 0.93 (0.68, 1.27) |         |
| Quintile 3                                                 | 2007/11213          | 0.85 (0.74, 0.98) |         | 543/11213     | 0.86 (0.65, 1.13) |         | 443/11213        | 0.80 (0.60, 1.09) |         |
| Quintile 4                                                 | 1996/11213          | 0.91 (0.79, 1.06) |         | 542/11213     | 0.98 (0.74, 1.29) |         | 453/11213        | 0.86 (0.63, 1.18) |         |
| Quintile 5                                                 | 2120/11213          | 0.93 (0.80, 1.08) | 0.852*  | 539/11213     | 0.95 (0.73, 1.22) | 0.968*  | 447/11213        | 0.82 (0.59, 1.13) | 0.201*  |

| Exposure                                                          | All-cause mortality |                   |         | CVD mortality |                   |         | Cancer mortality |                   |         |
|-------------------------------------------------------------------|---------------------|-------------------|---------|---------------|-------------------|---------|------------------|-------------------|---------|
|                                                                   | Case/N              | HR(95% CI)        | P value | Case/N        | HR(95% CI)        | P value | Case/N           | HR(95% CI)        | P value |
| (continued)                                                       |                     |                   |         |               |                   |         |                  |                   |         |
| <b>Lunch DAC (including DAC from lunch snack, coffee and tea)</b> |                     |                   |         |               |                   |         |                  |                   |         |
| Continuous lunch DAC                                              | 8566/56066          | 0.99 (0.98, 1.00) | 0.127   | 2196/56066    | 1.01 (0.98, 1.04) | 0.542   | 1984/56066       | 1.00 (0.97, 1.03) | 0.835   |
| Quintile 1                                                        | 1195/11214          | 1.00 (Reference)  |         | 273/11214     | 1.00 (Reference)  |         | 302/11214        | 1.00 (Reference)  |         |
| Quintile 2                                                        | 1781/11213          | 1.01 (0.89, 1.15) |         | 473/11213     | 1.14 (0.91, 1.42) |         | 403/11213        | 0.94 (0.72, 1.22) |         |
| Quintile 3                                                        | 1858/11213          | 0.96 (0.84, 1.09) |         | 492/11213     | 1.19 (0.95, 1.49) |         | 417/11213        | 0.93 (0.71, 1.23) |         |
| Quintile 4                                                        | 1833/11213          | 0.95 (0.82, 1.10) |         | 444/11213     | 1.07 (0.83, 1.38) |         | 426/11213        | 1.02 (0.77, 1.35) |         |
| Quintile 5                                                        | 1899/11213          | 0.93 (0.81, 1.07) | 0.168*  | 514/11213     | 1.17 (0.92, 1.50) | 0.462*  | 436/11213        | 0.94 (0.70, 1.26) | 0.928*  |
| <b>Lunch DAC (including DAC from lunch snack)</b>                 |                     |                   |         |               |                   |         |                  |                   |         |
| Continuous lunch DAC                                              | 8566/56066          | 0.98 (0.96, 0.99) | 0.014   | 2196/56066    | 1.01 (0.97, 1.04) | 0.744   | 1984/56066       | 0.99 (0.95, 1.04) | 0.658   |
| Quintile 1                                                        | 1241/11214          | 1.00 (Reference)  |         | 277/11214     | 1.00 (Reference)  |         | 321/11214        | 1.00 (Reference)  |         |
| Quintile 2                                                        | 1837/11213          | 1.07 (0.97, 1.18) |         | 480/11213     | 1.22 (0.97, 1.54) |         | 417/11213        | 0.96 (0.73, 1.26) |         |
| Quintile 3                                                        | 1927/11213          | 1.07 (0.95, 1.19) |         | 535/11213     | 1.29 (1.02, 1.63) |         | 418/11213        | 0.94 (0.71, 1.26) |         |
| Quintile 4                                                        | 1945/11213          | 1.04 (0.93, 1.17) |         | 490/11213     | 1.17 (0.90, 1.53) |         | 477/11213        | 1.12 (0.85, 1.47) |         |
| Quintile 5                                                        | 1616/11213          | 0.96 (0.86, 1.07) | 0.272*  | 414/11213     | 1.08 (0.81, 1.44) | 0.939*  | 351/11213        | 0.83 (0.60, 1.15) | 0.563*  |
| <b>Lunch DAC (including DAC from lunch coffee)</b>                |                     |                   |         |               |                   |         |                  |                   |         |
| Continuous lunch DAC                                              | 8566/56066          | 0.98 (0.96, 1.00) | 0.087   | 2196/56066    | 1.00 (0.96, 1.03) | 0.812   | 1984/56066       | 1.01 (0.98, 1.04) | 0.455   |
| Quintile 1                                                        | 1207/11214          | 1.00 (Reference)  |         | 268/11214     | 1.00 (Reference)  |         | 318/11214        | 1.00 (Reference)  |         |

| Exposure                                                            | All-cause mortality |                   |         | CVD mortality |                   |         | Cancer mortality |                   |         |
|---------------------------------------------------------------------|---------------------|-------------------|---------|---------------|-------------------|---------|------------------|-------------------|---------|
|                                                                     | Case/N              | HR(95% CI)        | P value | Case/N        | HR(95% CI)        | P value | Case/N           | HR(95% CI)        | P value |
| <b>(continued)</b>                                                  |                     |                   |         |               |                   |         |                  |                   |         |
| Quintile 2                                                          | 1740/11213          | 0.94 (0.84, 1.07) |         | 458/11213     | 1.08 (0.81, 1.44) |         | 371/11213        | 0.96 (0.75, 1.23) |         |
| Quintile 3                                                          | 1782/11213          | 0.93 (0.83, 1.06) |         | 508/11213     | 1.25 (0.98, 1.59) |         | 391/11213        | 0.88 (0.68, 1.15) |         |
| Quintile 4                                                          | 1928/11213          | 0.96 (0.84, 1.10) |         | 496/11213     | 1.10 (0.84, 1.43) |         | 458/11213        | 1.10 (0.85, 1.42) |         |
| Quintile 5                                                          | 1909/11213          | 0.91 (0.79, 1.05) | 0.338*  | 466/11213     | 1.09 (0.84, 1.41) | 0.656*  | 446/11213        | 1.04 (0.79, 1.37) | 0.410*  |
| <b>Lunch DAC (including DAC from lunch tea)</b>                     |                     |                   |         |               |                   |         |                  |                   |         |
| Continuous lunch DAC                                                | 8566/56066          | 0.98 (0.97, 1.00) | 0.037   | 2196/56066    | 1.01 (0.98, 1.05) | 0.437   | 1984/56066       | 0.99 (0.95, 1.02) | 0.467   |
| Quintile 1                                                          | 1243/11214          | 1.00 (Reference)  |         | 274/11214     | 1.00 (Reference)  |         | 331/11214        | 1.00 (Reference)  |         |
| Quintile 2                                                          | 1788/11213          | 0.96 (0.84, 1.08) |         | 461/11213     | 1.11 (0.84, 1.45) |         | 406/11213        | 0.95 (0.74, 1.23) |         |
| Quintile 3                                                          | 1800/11213          | 0.94 (0.83, 1.07) |         | 501/11213     | 1.23 (0.97, 1.55) |         | 393/11213        | 0.89 (0.69, 1.15) |         |
| Quintile 4                                                          | 1894/11213          | 0.94 (0.82, 1.07) |         | 484/11213     | 1.02 (0.79, 1.31) |         | 454/11213        | 1.07 (0.82, 1.40) |         |
| Quintile 5                                                          | 1841/11213          | 0.90 (0.78, 1.02) | 0.117*  | 476/11213     | 1.13 (0.90, 1.43) | 0.680*  | 400/11213        | 0.92 (0.68, 1.26) | 0.929*  |
| <b>Dinner DAC (including DAC from dinner snack, coffee and tea)</b> |                     |                   |         |               |                   |         |                  |                   |         |
| Continuous dinner DAC                                               | 8566/56066          | 0.99 (0.98, 1.00) | 0.21    | 2196/56066    | 1.01 (0.98, 1.04) | 0.379   | 1984/56066       | 1.00 (0.98, 1.02) | 0.713   |
| Quintile 1                                                          | 1476/11214          | 1.00 (Reference)  |         | 336/11214     | 1.00 (Reference)  |         | 386/11214        | 1.00 (Reference)  |         |
| Quintile 2                                                          | 1715/11213          | 0.92 (0.80, 1.05) |         | 464/11213     | 1.11 (0.82, 1.51) |         | 380/11213        | 0.83 (0.64, 1.07) |         |
| Quintile 3                                                          | 1648/11213          | 0.87 (0.75, 1.01) |         | 410/11213     | 0.95 (0.68, 1.31) |         | 365/11213        | 0.79 (0.62, 1.00) |         |
| Quintile 4                                                          | 1668/11213          | 0.84 (0.73, 0.97) |         | 462/11213     | 1.16 (0.85, 1.59) |         | 365/11213        | 0.71 (0.55, 0.91) |         |
| Quintile 5                                                          | 2059/11213          | 0.88 (0.78, 0.99) | 0.020*  | 524/11213     | 1.04 (0.79, 1.36) | 0.743*  | 488/11213        | 0.87 (0.69, 1.11) | 0.218*  |

| Exposure                                             | All-cause mortality |                   |         | CVD mortality |                   |         | Cancer mortality |                   |         |
|------------------------------------------------------|---------------------|-------------------|---------|---------------|-------------------|---------|------------------|-------------------|---------|
|                                                      | Case/N              | HR(95% CI)        | P value | Case/N        | HR(95% CI)        | P value | Case/N           | HR(95% CI)        | P value |
| <b>(continued)</b>                                   |                     |                   |         |               |                   |         |                  |                   |         |
| <b>Dinner DAC (including DAC from dinner snack)</b>  |                     |                   |         |               |                   |         |                  |                   |         |
| Continuous dinner DAC                                | 8566/56066          | 0.97 (0.95, 0.99) | 0.002   | 2196/56066    | 0.97 (0.93, 1.00) | 0.075   | 1984/56066       | 0.99 (0.95, 1.03) | 0.545   |
| Quintile 1                                           | 1514/11214          | 1.00 (Reference)  |         | 359/11214     | 1.00 (Reference)  |         | 393/11214        | 1.00 (Reference)  |         |
| Quintile 2                                           | 1922/11213          | 0.94 (0.82, 1.07) |         | 500/11213     | 1.09 (0.79, 1.50) |         | 436/11213        | 0.85 (0.68, 1.06) |         |
| Quintile 3                                           | 1714/11213          | 0.81 (0.71, 0.93) |         | 457/11213     | 0.87 (0.64, 1.18) |         | 378/11213        | 0.80 (0.62, 1.04) |         |
| Quintile 4                                           | 1789/11213          | 0.84 (0.73, 0.96) |         | 477/11213     | 1.05 (0.80, 1.38) |         | 386/11213        | 0.70 (0.55, 0.90) |         |
| Quintile 5                                           | 1627/11213          | 0.84 (0.74, 0.96) | 0.001*  | 403/11213     | 0.93 (0.73, 1.19) | 0.433*  | 391/11213        | 0.90 (0.71, 1.14) | 0.200*  |
| <b>Dinner DAC (including DAC from dinner coffee)</b> |                     |                   |         |               |                   |         |                  |                   |         |
| Continuous dinner DAC                                | 8566/56066          | 0.98 (0.97, 1.00) | 0.023   | 2196/56066    | 0.99 (0.96, 1.02) | 0.351   | 1984/56066       | 1.01 (0.98, 1.04) | 0.592   |
| Quintile 1                                           | 1470/11214          | 1.00 (Reference)  |         | 337/11214     | 1.00 (Reference)  |         | 366/11214        | 1.00 (Reference)  |         |
| Quintile 2                                           | 2009/11213          | 0.94 (0.83, 1.06) |         | 528/11213     | 0.93 (0.72, 1.18) |         | 468/11213        | 1.04 (0.81, 1.34) |         |
| Quintile 3                                           | 1717/11213          | 0.87 (0.78, 0.98) |         | 454/11213     | 0.94 (0.73, 1.20) |         | 360/11213        | 0.79 (0.62, 1.01) |         |
| Quintile 4                                           | 1499/11213          | 0.82 (0.72, 0.94) |         | 393/11213     | 0.96 (0.75, 1.23) |         | 343/11213        | 0.83 (0.62, 1.10) |         |
| Quintile 5                                           | 1871/11213          | 0.86 (0.76, 0.98) | 0.003*  | 484/11213     | 0.92 (0.72, 1.18) | 0.675*  | 447/11213        | 0.95 (0.74, 1.23) | 0.318*  |
| <b>Dinner DAC (including DAC from dinner tea)</b>    |                     |                   |         |               |                   |         |                  |                   |         |
| Continuous dinner DAC                                | 8566/56066          | 0.99 (0.98, 1.01) | 0.395   | 2196/56066    | 1.02 (0.98, 1.05) | 0.305   | 1984/56066       | 1.00 (0.98, 1.02) | 0.926   |
| Quintile 1                                           | 1426/11214          | 1.00 (Reference)  |         | 332/11214     | 1.00 (Reference)  |         | 353/11214        | 1.00 (Reference)  |         |
| Quintile 2                                           | 1968/11213          | 0.95 (0.85, 1.07) |         | 519/11213     | 1.00 (0.78, 1.28) |         | 453/11213        | 1.03 (0.79, 1.33) |         |

| Exposure                                                | All-cause mortality |                   |         | CVD mortality |                   |         | Cancer mortality |                   |         |
|---------------------------------------------------------|---------------------|-------------------|---------|---------------|-------------------|---------|------------------|-------------------|---------|
|                                                         | Case/N              | HR(95% CI)        | P value | Case/N        | HR(95% CI)        | P value | Case/N           | HR(95% CI)        | P value |
| (continued)                                             |                     |                   |         |               |                   |         |                  |                   |         |
| Quintile 3                                              | 1575/11213          | 0.87 (0.76, 0.99) |         | 391/11213     | 0.88 (0.67, 1.16) |         | 340/11213        | 0.83 (0.65, 1.06) |         |
| Quintile 4                                              | 1511/11213          | 0.85 (0.72, 0.99) |         | 394/11213     | 1.03 (0.73, 1.45) |         | 349/11213        | 0.82 (0.64, 1.06) |         |
| Quintile 5                                              | 2086/11213          | 0.91 (0.80, 1.03) | 0.070*  | 560/11213     | 1.02 (0.81, 1.28) | 0.753*  | 489/11213        | 1.00 (0.78, 1.27) | 0.568*  |
| <b>ΔDAC (including ΔDAC from snack, coffee and tea)</b> |                     |                   |         |               |                   |         |                  |                   |         |
| Continuous ΔDAC                                         | 8566/56066          | 1.01 (1.00, 1.01) | 0.073   | 2196/56066    | 1.01 (1.00, 1.03) | 0.131   | 1984/56066       | 1.00 (0.98, 1.01) | 0.665   |
| Quintile 1                                              | 2079/11214          | 1.00 (Reference)  |         | 525/11214     | 1.00 (Reference)  |         | 531/11214        | 1.00 (Reference)  |         |
| Quintile 2                                              | 2077/11213          | 1.16 (1.06, 1.27) |         | 537/11213     | 1.13 (0.92, 1.39) |         | 435/11213        | 1.04 (0.85, 1.27) |         |
| Quintile 3                                              | 1688/11213          | 1.18 (1.06, 1.31) |         | 424/11213     | 1.15 (0.90, 1.45) |         | 390/11213        | 1.13 (0.89, 1.42) |         |
| Quintile 4                                              | 1315/11213          | 1.17 (1.06, 1.31) |         | 332/11213     | 1.16 (0.96, 1.42) |         | 298/11213        | 1.10 (0.84, 1.43) |         |
| Quintile 5                                              | 1407/11213          | 1.07 (0.97, 1.18) | 0.072*  | 378/11213     | 1.20 (0.98, 1.47) | 0.049*  | 330/11213        | 0.95 (0.75, 1.21) | 0.985*  |
| <b>ΔDAC (including ΔDAC from snack)</b>                 |                     |                   |         |               |                   |         |                  |                   |         |
| Continuous ΔDAC                                         | 8566/56066          | 0.99 (0.97, 1.00) | 0.024   | 2196/56066    | 0.99 (0.96, 1.01) | 0.225   | 1984/56066       | 1.00 (0.97, 1.03) | 0.933   |
| Quintile 1                                              | 2044/11214          | 1.00 (Reference)  |         | 518/11214     | 1.00 (Reference)  |         | 486/11214        | 1.00 (Reference)  |         |
| Quintile 2                                              | 1938/11213          | 0.97 (0.85, 1.10) |         | 500/11213     | 1.05 (0.85, 1.30) |         | 418/11213        | 0.67 (0.53, 0.84) |         |
| Quintile 3                                              | 1724/11213          | 0.96 (0.85, 1.07) |         | 436/11213     | 0.98 (0.78, 1.24) |         | 395/11213        | 0.86 (0.65, 1.13) |         |
| Quintile 4                                              | 1438/11213          | 0.84 (0.75, 0.95) |         | 391/11213     | 0.94 (0.75, 1.18) |         | 313/11213        | 0.67 (0.51, 0.88) |         |
| Quintile 5                                              | 1422/11213          | 0.88 (0.78, 0.98) | 0.003*  | 351/11213     | 0.93 (0.75, 1.15) | 0.223*  | 372/11213        | 0.88 (0.67, 1.15) | 0.331*  |
| <b>ΔDAC (including ΔDAC from coffee)</b>                |                     |                   |         |               |                   |         |                  |                   |         |
| Continuous ΔDAC                                         | 8566/56066          | 1.01 (1.00, 1.02) | 0.021   | 2196/56066    | 1.01 (1.00, 1.03) | 0.08    | 1984/56066       | 1.00 (0.98, 1.02) | 0.821   |

| Exposure                              | All-cause mortality |                   |         | CVD mortality |                   |         | Cancer mortality |                   |         |
|---------------------------------------|---------------------|-------------------|---------|---------------|-------------------|---------|------------------|-------------------|---------|
|                                       | Case/N              | HR(95% CI)        | P value | Case/N        | HR(95% CI)        | P value | Case/N           | HR(95% CI)        | P value |
| <b>(continued)</b>                    |                     |                   |         |               |                   |         |                  |                   |         |
| Quintile 1                            | 2190/11214          | 1.00 (Reference)  |         | 552/11214     | 1.00 (Reference)  |         | 567/11214        | 1.00 (Reference)  |         |
| Quintile 2                            | 2139/11213          | 1.10 (1.00, 1.21) |         | 562/11213     | 1.07 (0.89, 1.29) |         | 434/11213        | 0.98 (0.80, 1.21) |         |
| Quintile 3                            | 1681/11213          | 1.23 (1.09, 1.40) |         | 421/11213     | 1.27 (1.00, 1.61) |         | 377/11213        | 1.08 (0.87, 1.34) |         |
| Quintile 4                            | 1370/11213          | 1.17 (1.04, 1.32) |         | 328/11213     | 1.12 (0.88, 1.44) |         | 315/11213        | 0.99 (0.78, 1.24) |         |
| Quintile 5                            | 1186/11213          | 1.14 (0.99, 1.31) | 0.013*  | 333/11213     | 1.32 (1.07, 1.61) | 0.009*  | 291/11213        | 1.14 (0.84, 1.54) | 0.483*  |
| <b>ΔDAC (including ΔDAC from tea)</b> |                     |                   |         |               |                   |         |                  |                   |         |
| Continuous ΔDAC                       | 8566/56066          | 1.00 (0.99, 1.02) | 0.736   | 2196/56066    | 1.03 (0.99, 1.07) | 0.206   | 1984/56066       | 0.99 (0.97, 1.02) | 0.612   |
| Quintile 1                            | 1911/11214          | 1.00 (Reference)  |         | 495/11214     | 1.00 (Reference)  |         | 437/11214        | 1.00 (Reference)  |         |
| Quintile 2                            | 1899/11213          | 0.96 (0.85, 1.08) |         | 495/11213     | 0.96 (0.78, 1.18) |         | 412/11213        | 0.83 (0.66, 1.05) |         |
| Quintile 3                            | 1635/11213          | 0.97 (0.85, 1.10) |         | 391/11213     | 0.92 (0.74, 1.15) |         | 380/11213        | 0.91 (0.70, 1.18) |         |
| Quintile 4                            | 1291/11213          | 0.91 (0.80, 1.03) |         | 320/11213     | 0.90 (0.73, 1.10) |         | 309/11213        | 0.89 (0.67, 1.19) |         |
| Quintile 5                            | 1830/11213          | 0.89 (0.79, 0.99) | 0.034*  | 495/11213     | 0.93 (0.79, 1.11) | 0.403*  | 446/11213        | 0.96 (0.75, 1.22) | 0.996*  |

Abbreviations: HRs, hazard ratio; CIs, confidence intervals; DAC, dietary total antioxidant capacity; HEI-2015, Healthy Eating Index 2015; BMI, body mass index; CVD, cardiovascular disease.

\* P for trend across the quintile of DAC. HR (95%CI) was estimated by weighted Cox regression analyses. Δ equals dinner DAC minus breakfast DAC.

Model was adjusted for, age, sex, race, education, family income, dietary energy intake, alcohol consumption per day, smoking status, physical activity, BMI, diabetes, hypertension, CVD, cancer, hyperlipidaemia, adherence to HEI-2015 score, and dietary supplement use.

Models for breakfast DAC, lunch DAC, and dinner DAC were further adjusted except for the one that defined the group.

Models for DAC including coffee were further adjusted for caffeine intake.

**Supplementary Table 20 Associations of all-cause, CVD, and cancer mortality with DAC using non-imputation data**

| Exposure                 | All-cause mortality |                | CVD mortality     |                | Cancer mortality  |                |
|--------------------------|---------------------|----------------|-------------------|----------------|-------------------|----------------|
|                          | HR (95% CI)         | <i>P</i> value | HR (95% CI)       | <i>P</i> value | HR (95% CI)       | <i>P</i> value |
| <b>Total DAC</b>         |                     |                |                   |                |                   |                |
| Continuous total DAC     | 0.98 (0.95, 1.01)   | 0.128          | 1.01 (0.97, 1.06) | 0.508          | 0.99 (0.94, 1.05) | 0.734          |
| Quintile 1               | 1.00 (Reference)    |                | 1.00 (Reference)  |                | 1.00 (Reference)  |                |
| Quintile 2               | 0.83 (0.67, 1.03)   |                | 0.68 (0.42, 1.12) |                | 1.34 (0.84, 2.13) |                |
| Quintile 3               | 0.90 (0.69, 1.16)   |                | 0.89 (0.55, 1.43) |                | 1.28 (0.76, 2.16) |                |
| Quintile 4               | 0.83 (0.64, 1.08)   |                | 0.99 (0.63, 1.56) |                | 1.01 (0.66, 1.54) |                |
| Quintile 5               | 0.80 (0.62, 1.03)   | 0.194*         | 0.82 (0.53, 1.27) | 0.966*         | 0.97 (0.57, 1.66) | 0.418*         |
| <b>Breakfast DAC</b>     |                     |                |                   |                |                   |                |
| Continuous breakfast DAC | 1.02 (0.99, 1.06)   | 0.25           | 1.04 (0.98, 1.11) | 0.161          | 1.01 (0.93, 1.09) | 0.87           |
| Quintile 1               | 1.00 (Reference)    |                | 1.00 (Reference)  |                | 1.00 (Reference)  |                |
| Quintile 2               | 0.83 (0.60, 1.14)   |                | 0.87 (0.41, 1.82) |                | 1.02 (0.60, 1.73) |                |
| Quintile 3               | 0.79 (0.60, 1.05)   |                | 0.95 (0.55, 1.65) |                | 0.79 (0.49, 1.27) |                |
| Quintile 4               | 0.91 (0.66, 1.25)   |                | 1.07 (0.63, 1.82) |                | 0.80 (0.48, 1.30) |                |
| Quintile 5               | 0.99 (0.71, 1.39)   | 0.570*         | 1.20 (0.68, 2.13) | 0.173*         | 0.93 (0.55, 1.59) | 0.620*         |
| <b>Lunch DAC</b>         |                     |                |                   |                |                   |                |
| Continuous lunch DAC     | 0.99 (0.96, 1.02)   | 0.393          | 1.06 (1.00, 1.12) | 0.073          | 0.98 (0.91, 1.05) | 0.569          |
| Quintile 1               | 1.00 (Reference)    |                | 1.00 (Reference)  |                | 1.00 (Reference)  |                |
| Quintile 2               | 1.04 (0.83, 1.31)   |                | 1.35 (0.69, 2.66) |                | 1.20 (0.78, 1.85) |                |
| Quintile 3               | 0.99 (0.77, 1.26)   |                | 1.45 (0.88, 2.39) |                | 1.15 (0.76, 1.73) |                |
| Quintile 4               | 1.07 (0.85, 1.35)   |                | 1.32 (0.85, 2.04) |                | 0.90 (0.55, 1.45) |                |
| Quintile 5               | 1.04 (0.82, 1.32)   | 0.722*         | 1.53 (0.91, 2.55) | 0.146*         | 1.14 (0.73, 1.76) | 0.864*         |

| Exposure              | All-cause mortality |                | CVD mortality     |                | Cancer mortality  |                |
|-----------------------|---------------------|----------------|-------------------|----------------|-------------------|----------------|
|                       | HR (95% CI)         | <i>P</i> value | HR (95% CI)       | <i>P</i> value | HR (95% CI)       | <i>P</i> value |
| <b>(continued)</b>    |                     |                |                   |                |                   |                |
| <b>Dinner DAC</b>     |                     |                |                   |                |                   |                |
| Continuous dinner DAC | 0.96 (0.89, 1.03)   | 0.22           | 0.90 (0.80, 1.02) | 0.095          | 1.03 (0.92, 1.15) | 0.602          |
| Quintile 1            | 1.00 (Reference)    |                | 1.00 (Reference)  |                | 1.00 (Reference)  |                |
| Quintile 2            | 0.73 (0.58, 0.91)   |                | 0.69 (0.42, 1.15) |                | 0.69 (0.46, 1.05) |                |
| Quintile 3            | 0.75 (0.60, 0.94)   |                | 0.80 (0.48, 1.34) |                | 0.68 (0.42, 1.09) |                |
| Quintile 4            | 0.73 (0.57, 0.93)   |                | 0.73 (0.45, 1.20) |                | 0.89 (0.61, 1.31) |                |
| Quintile 5            | 0.71 (0.54, 0.93)   | 0.041*         | 0.58 (0.34, 0.97) | 0.085*         | 0.84 (0.53, 1.34) | 0.953*         |
| <b>Δ DAC</b>          |                     |                |                   |                |                   |                |
| Continuous Δ DAC      | 0.97 (0.94, 1.00)   | 0.059          | 0.94 (0.89, 0.98) | 0.009          | 1.02 (0.94, 1.10) | 0.66           |
| Quintile 1            | 1.00 (Reference)    |                | 1.00 (Reference)  |                | 1.00 (Reference)  |                |
| Quintile 2            | 0.92 (0.77, 1.11)   |                | 1.18 (0.78, 1.76) |                | 0.69 (0.47, 1.00) |                |
| Quintile 3            | 0.97 (0.74, 1.26)   |                | 0.92 (0.61, 1.38) |                | 0.81 (0.49, 1.33) |                |
| Quintile 4            | 0.83 (0.69, 1.01)   |                | 0.64 (0.40, 1.03) |                | 0.99 (0.65, 1.51) |                |
| Quintile 5            | 0.73 (0.57, 0.93)   | 0.005*         | 0.76 (0.49, 1.18) | 0.033*         | 0.82 (0.53, 1.27) | 0.886*         |

Abbreviations: HRs, hazard ratio; CIs, confidence intervals; DAC, dietary total antioxidant capacity; HEI-2015, Healthy Eating Index 2015; BMI, body mass index; CVD, cardiovascular disease.

\* *P* for trend across the quintile of DAC. HR (95%CI) was estimated by weighted Cox regression analyses. Δ equals dinner DAC minus breakfast DAC.

Model was adjusted for, age, sex, race, education, family income, dietary energy intake, alcohol consumption per day, smoking status, physical activity, BMI, diabetes, hypertension, CVD, cancer, hyperlipidaemia, adherence to HEI-2015 score, and dietary supplement use.

Models for breakfast DAC, lunch DAC, and dinner DAC were further adjusted except for the one that defined the group.
